# Supplementary material for: The organocatalyzed domino Michael–aldol reaction revisited. Synthesis of enantioenriched 3-hydroxycyclohexanone derivatives by reaction of enals with α,α′-diaryl-substituted acetone
Source: Royal Society of Chemistry journal article supplement (doi:10.1039/c5ra11215j), 2015-01-01
Supplement: c5ra11215j1.pdf [file c5ra11215j1.pdf]

## Electronic Supplementary Information

**The Organocatalyzed Domino Michael-Aldol Reaction Revisited. Synthesis of Enantioenriched 3-Hydroxycyclohexanone Derivatives by Reaction of Enals with  $\alpha,\alpha'$ -Diaryl-substituted Acetone.**

**James O. Guevara-Pulido, José M. Andrés and Rafael Pedrosa\***

Instituto CINQUIMA and Departamento de Química Orgánica, Facultad de Ciencias, Universidad de Valladolid. Paseo de Belén 7. 47011-Valladolid. Spain

E-mail: [pedrosa@go.uva.es](mailto:pedrosa@go.uva.es)

|                                                          |    |
|----------------------------------------------------------|----|
| Physical and espectral data of adducts 5 .....           | 2  |
| Copies of $^1\text{H}$ NMR and $^{13}\text{C}$ NMR ..... | 7  |
| HPLC traces of the mixtures .....                        | 19 |

**(3R,4S)-5-Oxo-3,4,6-triphenylhexanal (5aa).** White solid; mp 118.8-121.5 °C (hexane)  $[\alpha]_D^{25} = +50.5$ , ( $c = 1$ ,  $\text{CHCl}_3$ , 46%ee)  $^1\text{H-NMR}$  (500 MHz,  $\text{CDCl}_3$ )  $\delta$  2.35 (dd,  $J = 16.9$ , 3.0 Hz, 1H), 2.50 (dd,  $J = 14.8$ , 10.2 Hz, 1H), 3.38 (q,  $J = 15.7$  Hz, 2H), 4.05 (dd,  $J = 10.1$ , 4.1 Hz, 1H), 4.13 (d,  $J = 11.1$  Hz, 1H), 6.71 (d,  $J = 6.3$  Hz, 2H), 7.55 – 7.17 (m, 13H), 9.33 (s, 1H);  $^{13}\text{C-NMR}$  (126 MHz,  $\text{CDCl}_3$ )  $\delta$ , 42.8, 47.7, 50.4, 62.9, 126.0, 127.1, 128.2, 128.3, 128.7, 2C(128.8), 2C(128.9), 2C(129.2), 2C(129.4), 2C(129.6), 133.3, 136.0, 141.7, 200.9, 205.9; **HPLC** (Chiralpak AD-H hexane/iPrOH = 97:3, 0.7 mL/min,  $\lambda = 220$  nm)  $t_R = 32.7$  min (major),  $t_R = 35.2$  min (minor); **IR** 3055.1, 3028.4, 1704.5, 1491.0, 1453.6, 700.9. **HRMS**  $\text{C}_{24}\text{H}_{23}\text{O}_2$  (M+H), Calc: 343.1693, Found: 343.1692.

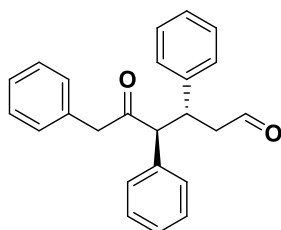

**(3R,4S)-3-(4-Methoxyphenyl)-5-oxo-4,6-diphenylhexanal (5ab)** White solid; mp 82.8-85.2 °C (hexane)  $[\alpha]_D^{25} = +40$ , ( $c = 1$ ,  $\text{CHCl}_3$ , 38%ee)  $^1\text{H-NMR}$  (500 MHz,  $\text{CDCl}_3$ )  $\delta$  2.33 (s, 1H), 2.46 (s, 1H), 3.39 (s, 2H), 3.80 (s, 3H), 4.00 (s, 1H), 4.08 (s, 1H), 6.76 (d,  $J = 8.4$  Hz, 2H), 7.22 (dd,  $J = 90.9$ , 29.6 Hz, 12H), 9.33 (s, 1H);  $^{13}\text{C-NMR}$  (126 MHz,  $\text{cdcl}_3$ )  $\delta$  42.0, 47.7, 50.5, 55.4, 63.2, 2C(114.2), 127.0, 127.2, 128.23, 128.7, 128.9, 129.1, 129.2, 129.3, 2C(129.6), 2C(129.7), 133.3, 133.6, 136.1, 158.5, 201.1, 206.0; **HPLC** (Chiralpak AD-H hexane/iPrOH) =90:10, 1 mL/min,  $\lambda = 220$  nm)  $t_R = 15.6$  min (minor),  $t_R = 20.2$  min (major); **IR** 3023.0, 2905.6, 1715.2, 1512.3, 1496.3, 1250.8, 695.6; **HRMS**  $\text{C}_{25}\text{H}_{25}\text{O}_3$  (M+H), Calc: 373.1798, Found: 373.1798.

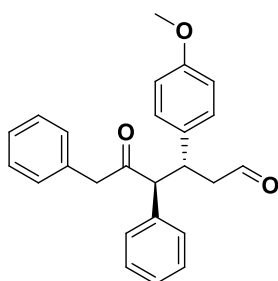

**(3R,4S)-3-(Furan-2-yl)-5-oxo-4,6-diphenylhexanal (5ac).** Colorless oil;  $[\alpha]_D^{25} = +29.0$ , ( $c = 0.9$ ,  $\text{CHCl}_3$ , 26%ee)  $^1\text{H-NMR}$  (400 MHz,  $\text{CDCl}_3$ )  $\delta$  2.24 (ddd,  $J = 16.9$ , 4.1, 1.3 Hz, 1H), 2.41 (ddd,  $J = 16.9$ , 9.4, 2.3 Hz, 1H), 3.44 (s, 2H), 3.93 – 4.15 (m, 1H), 4.17 (d,  $J = 10.7$  Hz, 1H), 5.72 (m, 1H), 6.16 (dd,  $J = 3.2$ , 1.9 Hz, 1H), 6.81 (dd,  $J = 6.8$ , 2.6 Hz, 2H), 7.37 – 6.97 (m, 9H), 9.35 (t,  $J = 1.8$  Hz, 1H);  $^{13}\text{C-NMR}$  (126 MHz,  $\text{CDCl}_3$ )  $\delta$  29.8, 35.8, 45.0, 49.8, 60.2, 107.4, 110.5, 127.1, 128.3, 128.7, 2C(128.9), 129.2, 129.4, 129.7, 133.6, 135.4, 2C(141.5), 154.4, 200.5, 205.9; **HPLC** (Chiralpak AD-H hexane/iPrOH = 95:5, 1 mL/min,  $\lambda = 220$  nm)  $t_R = 16.1$  min (major),  $t_R = 18.3$  min (minor); **IR** 3066, 3029, 2928.1, 2731.8, 1713, 1495.4, 1017, 699; **HRMS**  $\text{C}_{22}\text{H}_{21}\text{O}_3$  (M+H), Calc: 333.1485, Found: 333.1486.

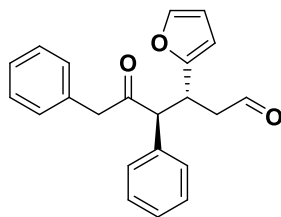

**(3R,4S)-3-Methyl-5-oxo-4,6-diphenylhexanal (5ad).** Colorless oil;  $[\alpha]_D^{25} = +69.5$ , ( $c = 1$ ,  $\text{CHCl}_3$ , 43%ee)  $^1\text{H-NMR}$  (400 MHz,  $\text{CDCl}_3$ )  $\delta$  0.89 (d,  $J = 6.4$  Hz, 3H), 1.94 (dd,  $J = 16.6$ , 8.8 Hz, 1H), 2.85 (s, 1H), 2.24 – 2.06 (m, 1H), 3.40 – 3.72 (m, 3H), 6.64–7.51 (m, 10H), 9.45 (s, 1H);  $^{13}\text{C-NMR}$  (101 MHz,  $\text{CDCl}_3$ )  $\delta$  19.2, 30.9, 48.2, 50.1, 63.3, 127.2, 128.0, 2C(128.8), 2C(129.2), 2C(129.3), 2C(129.7), 133.8, 136.6, 201.7, 206.7; **HPLC** (Chiralpak AD-H hexane/iPrOH = 97:3, 0.7 mL/min  $\lambda = 220$  nm)  $t_R = 17.2$  min (major),  $t_R = 18.5$  min (minor); **IR** 3034.2, 2965.2, 2922.8, 2721.2, 1713, 1453, 699. **HRMS**  $\text{C}_{19}\text{H}_{21}\text{O}_2$  (M+H), Calc: 281.1536, Found: 281.1536.

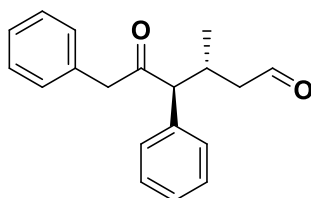

**(3R,4S)-3-Ethyl-5-oxo-4,6-diphenylhexanal (5ae).** Colorless oil;  $[\alpha]_D^{25} = +64.5$ , ( $c = 1.2$ ,  $\text{CHCl}_3$ , 39%ee)  $^1\text{H-NMR}$  (400 MHz,  $\text{CDCl}_3$ )  $\delta$  0.69 (t,  $J = 7.5$  Hz, 3H), 1.11 – 1.46 (m, 2H), 1.97 (ddd,  $J = 17.0$ , 6.9, 2.2 Hz, 1H), 2.12 (ddd,  $J = 17.0$ , 5.1, 1.8 Hz, 1H), 2.70 (ddd,  $J = 9.9$ , 7.2, 3.7 Hz, 1H), 3.55 (d,  $J = 3.0$  Hz, 2H), 3.77 (d,  $J = 10.1$  Hz, 1H), 6.68 – 7.53 (m, 10H), 9.31 (t,  $J = 2.0$  Hz, 1H);  $^{13}\text{C-NMR}$  (101 MHz,  $\text{CDCl}_3$ )  $\delta$  10.9, 25.5, 37.0, 44.8, 50.1, 61.0, 127.2, 128.1, 2C(128.8), 2C(129.3), 2C(129.4), 2C(129.7), 133.8, 136.5, 201.8, 207.0; **HPLC** (Chiralcel OD hexane/iPrOH = 97:3, 0.5 mL/min  $\lambda = 220$  nm)  $t_R = 22.3$  min (minor),  $t_R = 25.1$  min (major); **IR** 3066, 2965.2, 2726.5, 1713, 1453, 1277.8, 699; **HRMS**  $\text{C}_{20}\text{H}_{23}\text{O}_2$  (M+H), Calc: 295.1693, Found: 295.1696.

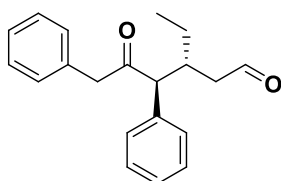

**(3R,4S)-5-Oxo-4,6-diphenyl-3-propylhexanal (5af).** Colorless oil;  $[\alpha]_D^{25} = +50.3$ , ( $c = 1$ ,  $\text{CHCl}_3$ , 32%ee)  $^1\text{H-NMR}$  (400 MHz,  $\text{CDCl}_3$ )  $\delta$  0.73 (dd,  $J = 8.8$ , 5.2 Hz, 3H), 0.95 – 1.31 (m, 4H), 1.96 (ddd,  $J = 17.1$ , 6.7, 2.2 Hz, 1H), 2.13 (ddd,  $J = 17.1$ , 5.1, 1.8 Hz, 1H), 2.55 – 2.98 (m, 1H), 3.30 – 3.67 (m, 2H), 3.78 (d,  $J = 10.1$  Hz, 1H), 6.76 – 7.59 (m, 10H), 9.31 (t,  $J = 2.0$  Hz, 1H);  $^{13}\text{C-NMR}$  (101 MHz,  $\text{CDCl}_3$ )  $\delta$  14.2, 19.9, 35.2, 35.6, 45.3, 50.1, 61.4, 127.2, 128.1, 128.3, 128.8, 2C(129.4), 2C(129.6), 2C(129.7), 133.8, 136.5, 201.8, 207.0; **HPLC** (Chiralcel OD hexane/iPrOH = 97:3, 0.5 mL/min  $\lambda = 220$  nm)  $t_R = 20.2$  min (minor),  $t_R = 22.5$  min (major); **IR** 3055.6, 2960, 2726, 1713, 1453, 699; **HRMS**  $\text{C}_{21}\text{H}_{25}\text{O}_2$  (M+H), Calc: 309.1849, Found: 309.1850.

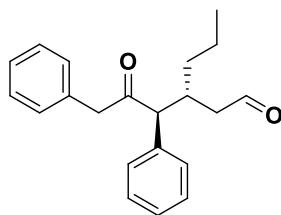

**(3R,4S)-3-(4-Methoxyphenyl)-5-oxo-4,6-dip-tolylhexanal (5bb).** Colorless oil;  $[\alpha]_D^{25} = +18.4$ , ( $c = 0.9$ ,  $\text{CHCl}_3$ , 46%ee)  $^1\text{H-NMR}$  (400 MHz,  $\text{CDCl}_3$ )  $\delta$  2.33 (m, 7H), 2.43 (ddd,  $J = 16.6, 9.9, 2.7$  Hz, 1H), 3.33 (d,  $J = 4.5$  Hz, 2H), 3.79 (s, 3H), 3.96 (dd,  $J = 10.0, 4.5$  Hz, 1H), 4.03 (d,  $J = 11.1$  Hz, 1H), 6.69 (m, 4H), 7.02 (m, 4H), 7.16 (s, 4H), 9.32 (dd,  $J = 2.6, 1.5$  Hz, 1H);  $^{13}\text{C-NMR}$  (101 MHz,  $\text{CDCl}_3$ )  $\delta$  2C(21.2), 41.9, 47.8, 49.8, 55.3, 62.7, 2C(114.1), 2C(129.0), 2C(129.2), 2C(129.3), 2C(129.5), 2C(130.0), 130.3, 133.1, 133.7, 136.5, 138.0, 158.5, 201.3, 206.3; **HPLC** (Chiralpak AD-H hexane/iPrOH = 95:5, 0.8 mL/min,  $\lambda = 220$  nm)  $t_R = 34.3$  min (major),  $t_R = 36.5$  min (minor); **IR** 3002.4, 2922.8, 2726.5, 1718.2, 1511.3; **HRMS**  $\text{C}_{27}\text{H}_{29}\text{O}_3$  (M+H), Calc: 401.2111, Found: 401.2115.

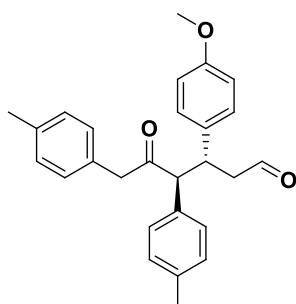

**(3R,4S)-4,6-Bis(4-chlorophenyl)-3-(4-methoxyphenyl)-5-oxohexanal (5cb).** White solid; mp 183-185  $^{\circ}\text{C}$  (hexane)  $[\alpha]_D^{25} = +2.2$ , ( $c = 0.8$ ,  $\text{CHCl}_3$ , 6%ee)  $^1\text{H-NMR}$  (400 MHz,  $\text{CDCl}_3$ )  $\delta$  2.23 (ddd,  $J = 16.8, 4.3, 1.3$  Hz, 1H), 2.41 (ddd,  $J = 16.8, 10.2, 2.5$  Hz, 1H), 3.24 (q,  $J = 15.7$  Hz, 2H), 3.72 (s, 3H), 3.77 – 3.91 (m, 1H), 3.96 (d,  $J = 11.2$  Hz, 1H), 6.31 – 7.60 (m, 12H), 9.27 (dd,  $J = 2.4, 1.3$  Hz, 1H);  $^{13}\text{C-NMR}$  (101 MHz,  $\text{CDCl}_3$ )  $\delta$  29.8, 42.1, 47.4, 49.9, 55.4, 62.7, 2C(114.2), 2C(128.8), 2C(129.2), 2C(129.6), 2C(130.3), 2C(130.9), 131.4, 133.0, 133.1, 134.4, 158.7, 200.6, 205.4; **HPLC** (Chiralpak AD-H hexane/iPrOH = 95:5, 0.8 mL/min,  $\lambda = 220$  nm)  $t_R = 41.5$  min (major),  $t_R = 63.7$  min (minor); **IR** 2960, 2922.8, 2848.5, 2731.8, 1914.6, 1718.2; **HRMS**  $\text{C}_{25}\text{H}_{23}\text{O}_3\text{Cl}_2$  (M+H), Calc: 441.1018, Found: 441.1009.

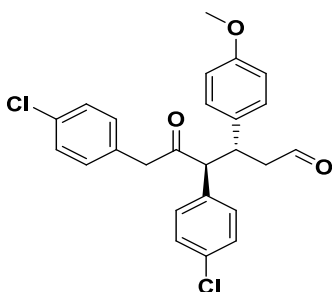

**(3R,4R)-3,4,6-tris(4-methoxyphenyl)-5-oxohexanal (5db).** White solid; mp 121-123  $^{\circ}\text{C}$  (hexane)  $[\alpha]_D^{25} = +7.8$ , ( $c = 0.7$ ,  $\text{CHCl}_3$ , 20%ee)  $^1\text{H-NMR}$  (500 MHz,  $\text{CDCl}_3$ )  $\delta$  2.32 (ddd,  $J = 16.6, 4.5, 1.5$  Hz, 1H), 2.43 (ddd,  $J = 16.6, 9.9, 2.7$  Hz, 1H), 3.30 (d,  $J = 3.8$  Hz, 2H), 3.77 (s, 3H), 3.78 (s, 3H), 3.81 (s, 3H), 3.94 (dd,  $J = 10.6, 3.7$  Hz, 1H), 4.00 (d,  $J = 11.1$  Hz, 1H),

6.39 – 7.41 (m, 12H), 9.32 (dd,  $J = 2.6, 1.5$  Hz, 1H);  $^{13}\text{C-NMR}$  (126 MHz,  $\text{CDCl}_3$ ),  $\delta$  41.9, 47.7, 49.3, 2C(55.3), 55.4, 62.0, 2C(113.9), 2C(114.0), 2C(114.6), 125.4, 128, 2C(129.1), 2C(130.2), 2C(130.6), 133.7, 158.4, 158.5, 159.5, 201.2, 206.4; **HPLC** (Chiralpak AD-H hexane/*i*PrOH = 80:20, 1.0 mL/min  $\lambda = 220$  nm)  $t_R = 23.8$  min (major),  $t_R = 20.1$  min (minor); **IR**. 2925, 2832, 2728, 1716, 1616, 1509, 1245, 1178, 1034, 811  $\text{cm}^{-1}$  **HRMS**  $\text{C}_{27}\text{H}_{28}\text{O}_5 + \text{Na}^+$ , Calc: 455.1828, Found: 455.1831.

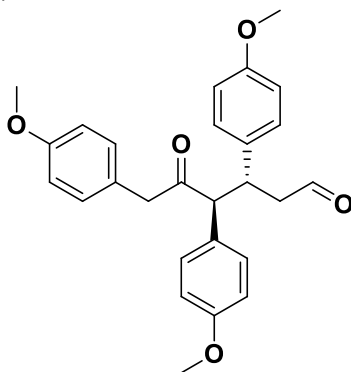

**(3R,4S)-3-(4-Methoxyphenyl)-4,6-di(naphthalen-2-yl)-5-oxohexanal (5eb)**. White solid; mp 170-172  $^{\circ}\text{C}$  (hexane)  $[\alpha]_D^{25} = -14.7$ , ( $c = 0.8$ ,  $\text{CHCl}_3$ , 38%ee)  $^1\text{H-NMR}$  (500 MHz,  $\text{CDCl}_3$ )  $\delta$  2.29 (dd,  $J = 16.8, 4.0$  Hz, 1H), 2.47 (m, 1H), 3.58 (s, 2H), 3.74 (d,  $J = 1.4$  Hz, 3H), 4.11 (m, 1H), 4.31 (d,  $J = 11.2$  Hz, 1H), 6.66 (m, 2H), 6.85 (d,  $J = 8.4$  Hz, 1H), 7.08 (m, 2H), 7.63 (m, 13H), 9.30 (s, 1H);  $^{13}\text{C-NMR}$  (126 MHz,  $\text{CDCl}_3$ )  $\delta$  41.9, 47.7, 50.6, 55.3, 63.2, 2C(114.0), 125.9, 126.2, 126.5, 126.7, 127.6, 2C(127.7), 127.8, 2C(127.9), 128.3, 128.5, 128.6, 128.7, 129.2, 129.3, 130.8, 132.5, 133.1, 133.4, 2C(133.5), 133.7, 158.5, 201.1, 205.9; **HPLC** (Chiralpak AD-H hexane/*i*PrOH = 90:10, 1 mL/min,  $\lambda = 220$  nm)  $t_R = 38.9$  min (minor),  $t_R = 56.7$  min (major); **IR** 3055, 2928, 2726, 1707, 1511, 1251; **HRMS**  $\text{C}_{33}\text{H}_{28}\text{O}_3 + \text{Na}^+$  Calc: 495.1930; Found 495.1923.

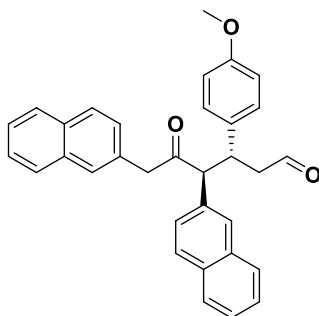

**(3R,4S)-5-Oxo-3,4-diphenylheptanal (5fa)**. White solid; mp 96-98  $^{\circ}\text{C}$  (hexane)  $[\alpha]_D^{25} = -11.5$ , ( $c = 1$ ,  $\text{CHCl}_3$ , 30%ee)  $^1\text{H-NMR}$  (500 MHz,  $\text{CDCl}_3$ )  $\delta$  0.72 (t,  $J = 7.3$  Hz, 3H), 2.02 – 1.95 (m, 1H), 2.35 – 2.28 (m, 1H), 2.44 – 2.37 (m, 1H), 2.60 – 2.52 (m, 1H), 4.08 – 4.03 (m, 2H), 7.21 (dt,  $J = 5.5, 4.0$  Hz, 1H), 7.27 (d,  $J = 0.5$  Hz, 1H), 7.32 – 7.29 (m, 4H), 7.33 (d,  $J = 4.4$  Hz, 1H), 7.36 (s, 2H), 7.37 (s, 1H), 9.37 (dd,  $J = 2.5, 1.6$  Hz, 1H);  $^{13}\text{C-NMR}$  (126 MHz,  $\text{CDCl}_3$ )  $\delta$  7.4, 36.7, 42.6, 47.6, 64.1, 2C(127.0), 128.0, 128.2, 128.3, 128.5, 128.7, 128.8, 128.9, 129.2, 136.2, 141.8, 200.8, 209.3; **HPLC** (Chiralcel OJ-H hexane/*i*PrOH = 95:5, 1.0 mL/min  $\lambda = 220$  nm)  $t_R = 25.8$  min (minor),  $t_R = 28.7$  min (major); **IR** 3033.8, 2937.7, 1709.8, 1496.3, 1453.6, 695.6. **HRMS**  $\text{C}_{19}\text{H}_{20}\text{O}_2 + \text{Na}^+$ , Calc: 303.1355, Found: 303.1364

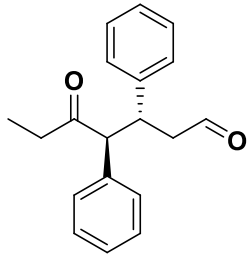

F73\_PROTON\_01

9.37  
7.36  
7.35  
7.33  
7.31  
7.27  
7.25  
7.22  
7.18  
6.70  
4.15  
4.12  
4.06  
4.04  
4.03  
3.42  
3.39  
3.34  
2.53  
2.50  
2.48  
2.36  
2.33

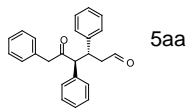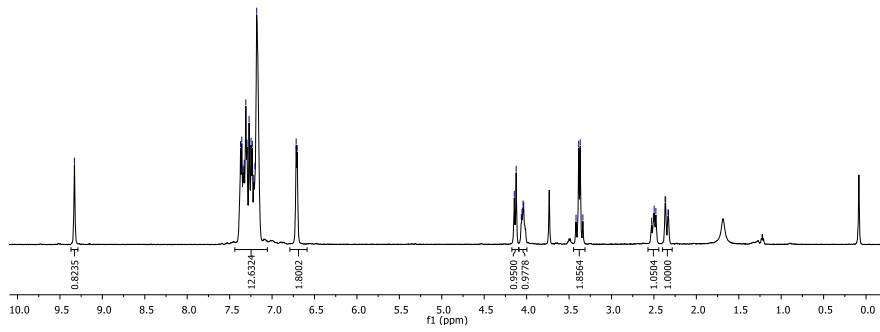

F73C\_CARBON\_01

205.86  
200.86  
141.68  
135.99  
133.35  
132.75  
129.38  
128.86  
128.80  
128.79  
128.75  
126.99  
62.91  
50.38  
47.76  
42.76

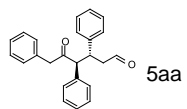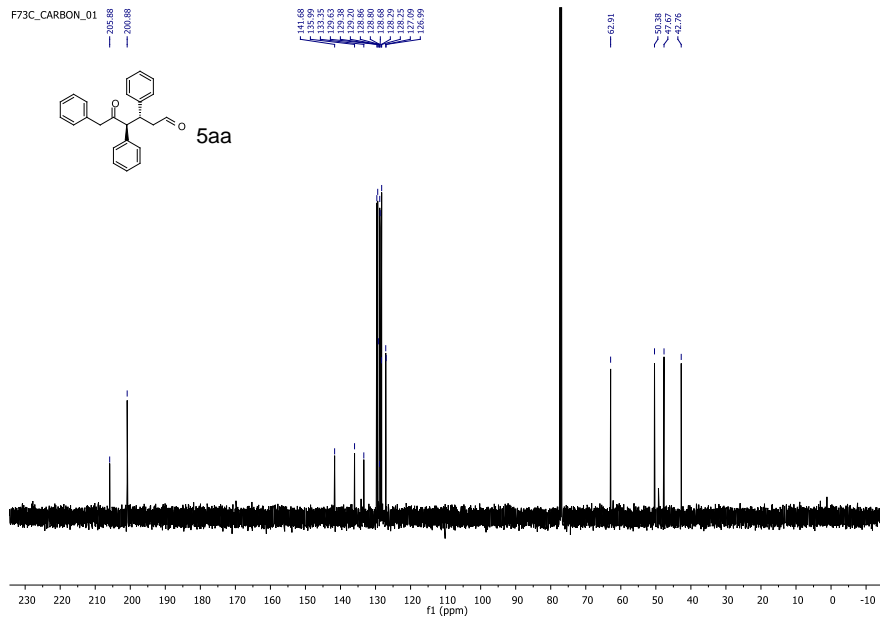

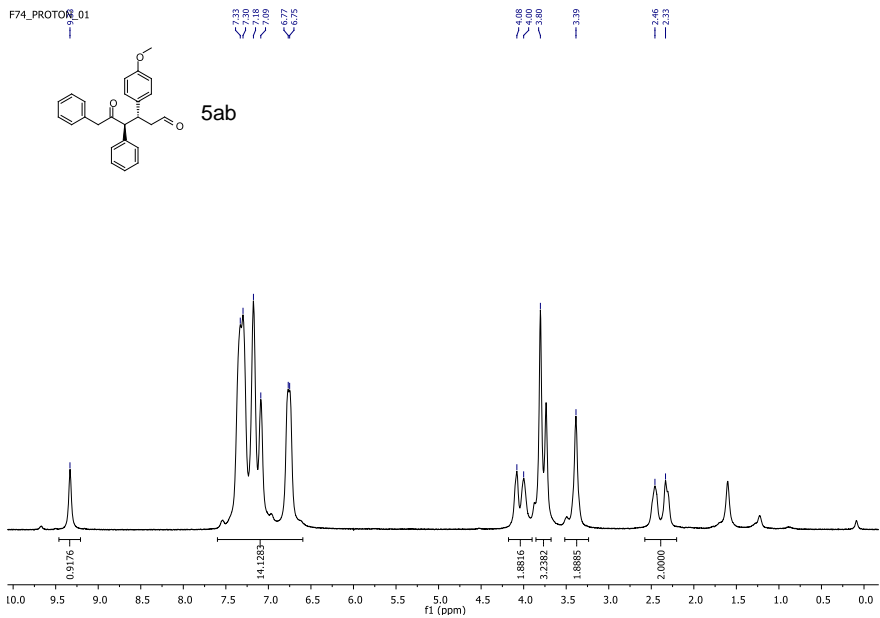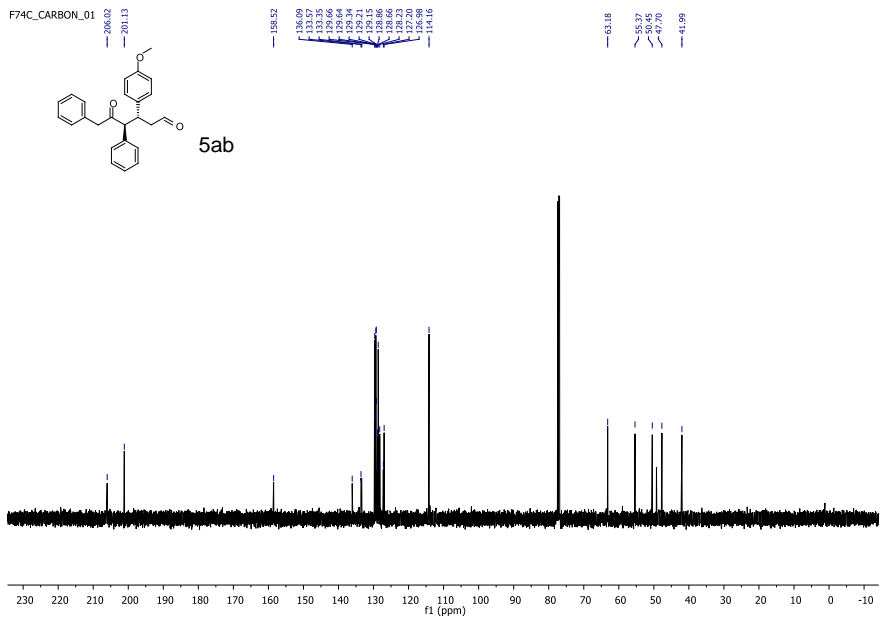



j988-2\_PROTON\_01  
j988-2

7.24  
7.24  
7.24  
7.18  
7.18  
7.18  
7.15  
7.15  
7.15  
7.14  
7.13  
7.12  
7.12  
6.82  
6.80  
6.80  
6.17  
6.16  
6.15  
5.94  
4.18  
4.12  
4.11  
4.08  
4.07  
3.44  
2.45  
2.44  
2.42  
2.40  
2.38  
2.36  
2.35  
2.32  
2.22  
2.21

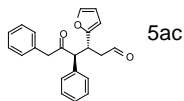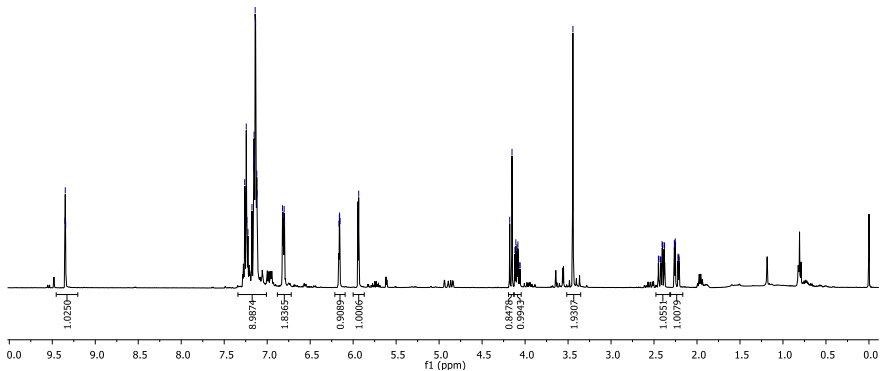

j989-1\_CARBON\_01  
j989-1

205.55  
200.50  
154.36  
141.55  
135.37  
133.57  
129.38  
129.16  
128.70  
127.86  
127.66  
107.39  
60.20  
49.80  
44.97  
38.85  
29.84

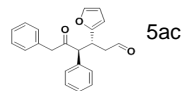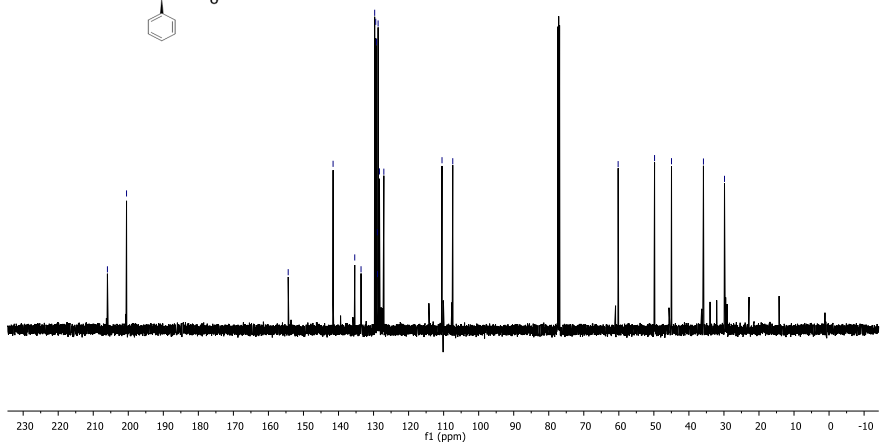

j982\_PROTON\_01  
j982

7.31  
7.29  
7.27  
7.24  
7.22  
7.15  
7.05  
7.03

3.66  
3.63  
3.61

2.85

1.16  
1.13  
1.12  
1.09  
1.05  
1.03

0.90  
0.88

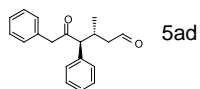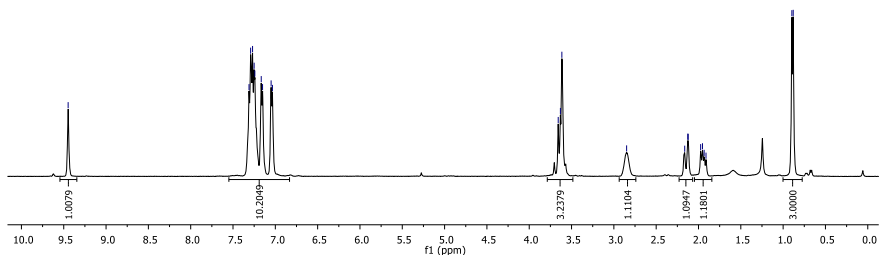

j982\_CARBON\_01  
j982

205.75  
201.74

136.69  
133.77  
129.71  
129.16  
128.98  
127.20

63.26

30.12  
28.59

30.89

16.17

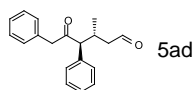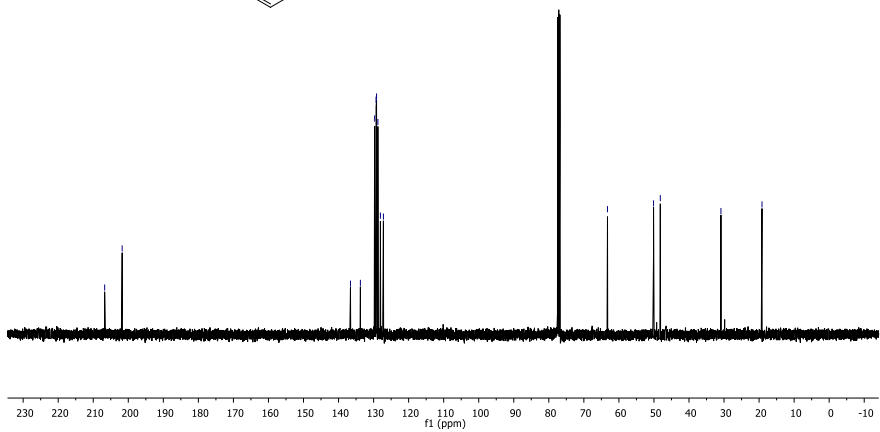

j984\_PROTONS\_01  
j984

7.24  
7.24  
7.23  
7.23  
7.22  
7.22  
7.21  
7.21  
7.19  
7.18  
7.18  
7.18  
7.10  
7.10  
7.08  
7.08  
6.99  
6.99  
6.98

3.78  
3.56  
3.55  
2.72  
2.71  
2.70  
2.70  
2.69  
2.68  
2.67  
2.10  
2.10  
2.00  
2.00  
1.30  
1.22  
1.18  
1.18  
0.99  
0.99

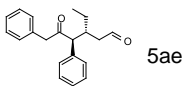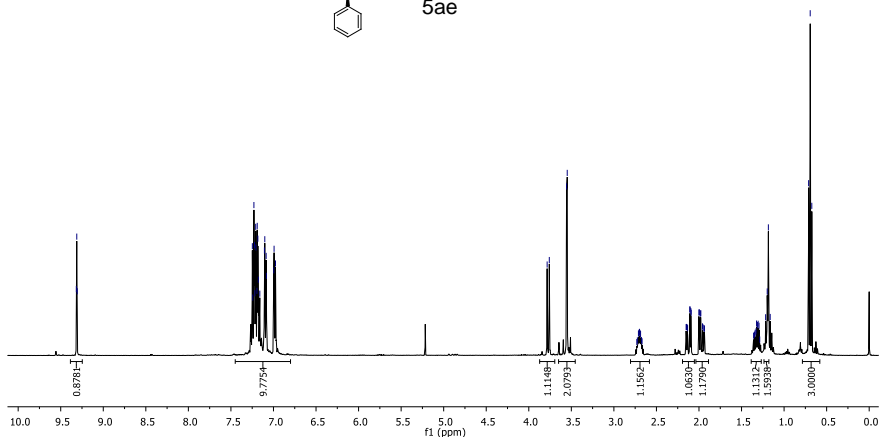

j984\_CARBON\_01  
j984

205.96  
201.76  
134.62  
133.83  
133.72  
129.72  
129.29  
128.78  
128.78  
127.19  
60.98  
50.06  
44.82  
38.97  
25.48  
10.96

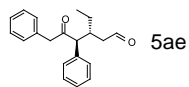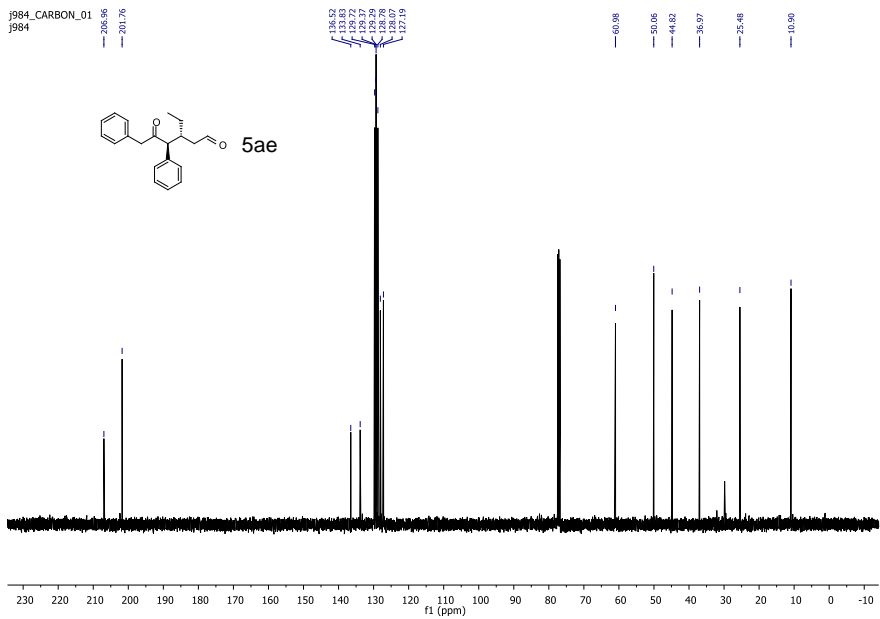

j986\_PROTON\_01  
j986

7.24  
7.23  
7.23  
7.22  
7.22  
7.20  
7.19  
7.18  
7.18  
7.10  
7.08  
7.00  
6.98  
3.79  
3.60  
3.56  
3.55  
3.51  
2.77  
2.76  
2.74  
2.73  
2.72  
2.12  
2.11  
1.99  
1.97  
1.20  
1.18  
1.10  
0.99  
0.74  
0.71

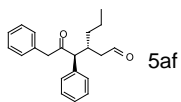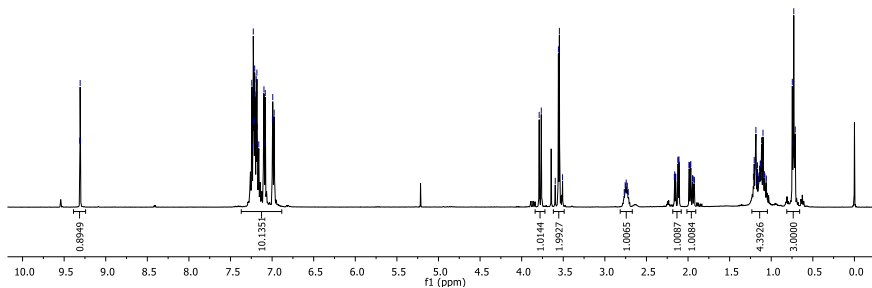

j986\_CARBON\_01  
j986

207.00  
201.79  
136.52  
133.72  
129.63  
129.38  
129.38  
128.95  
128.86  
127.18  
61.38  
50.11  
45.31  
35.98  
35.29  
19.86  
14.22

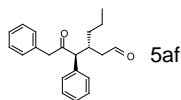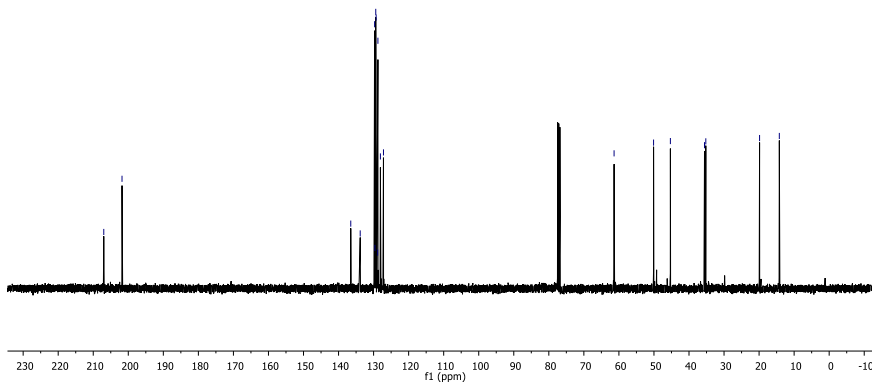

j996\_PROTON\_01  
j996

7.26  
7.06  
7.05  
6.97  
6.96  
6.83  
6.75  
6.62  
6.60

4.04  
4.01  
3.97  
3.96  
3.83  
3.82  
3.79  
3.72

2.47  
2.46  
2.44  
2.43  
2.40  
2.39  
2.34  
2.30

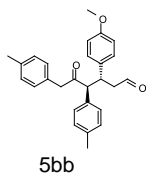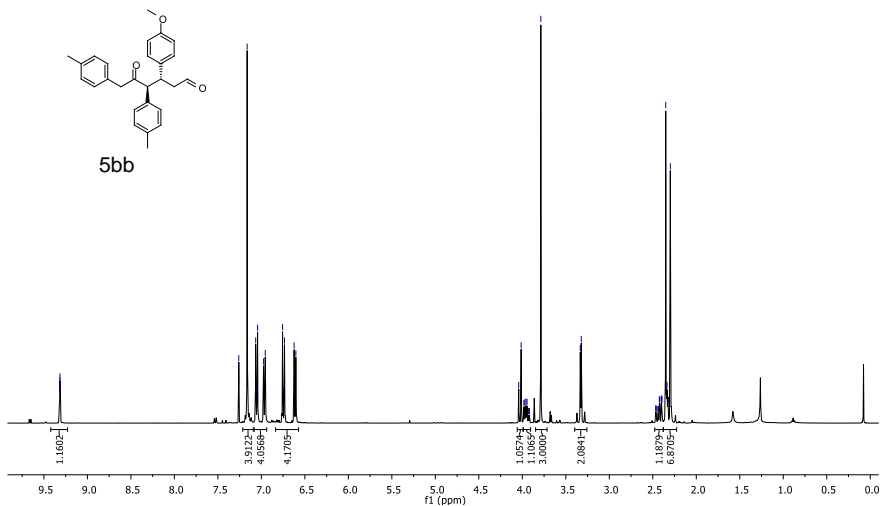

j996\_CARBON\_01  
j996

208.27  
201.31

158.47

132.98  
136.40  
133.74  
133.34  
130.34  
130.01  
129.32  
129.05  
128.65

114.07

65.66

58.34  
47.76

41.87

21.24  
21.19

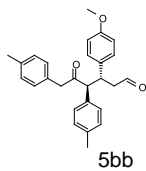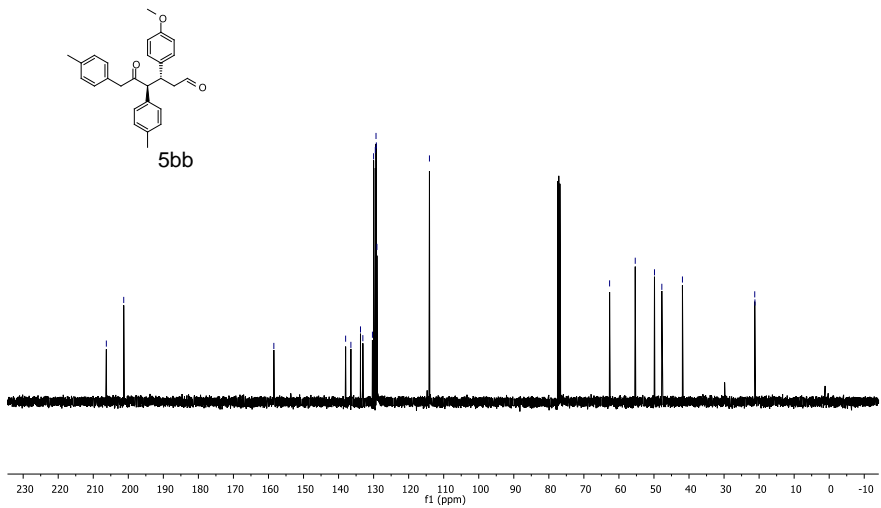

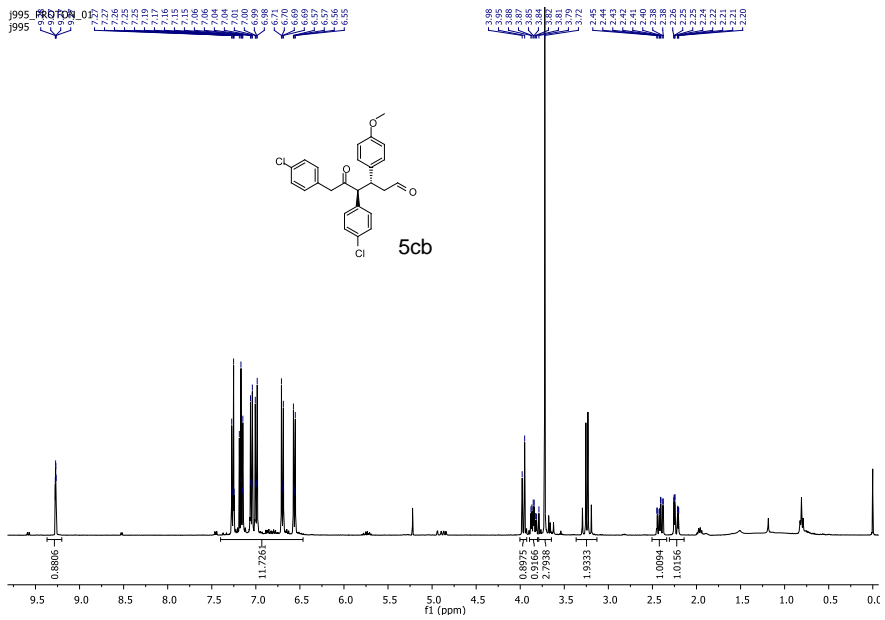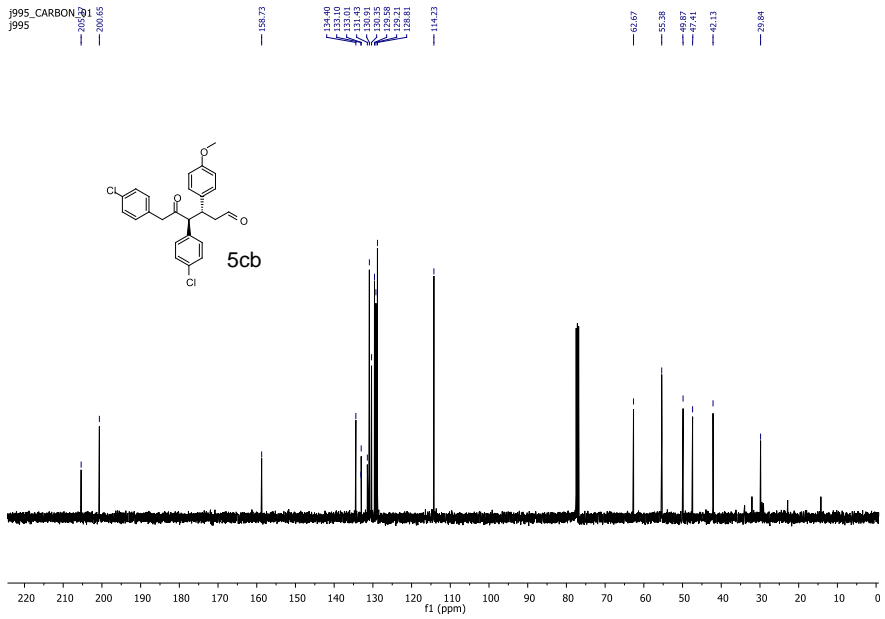

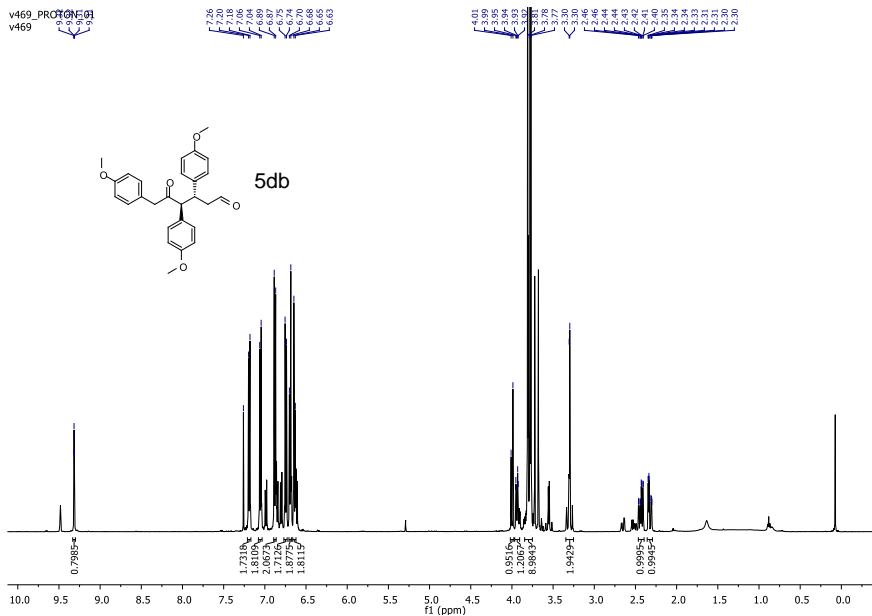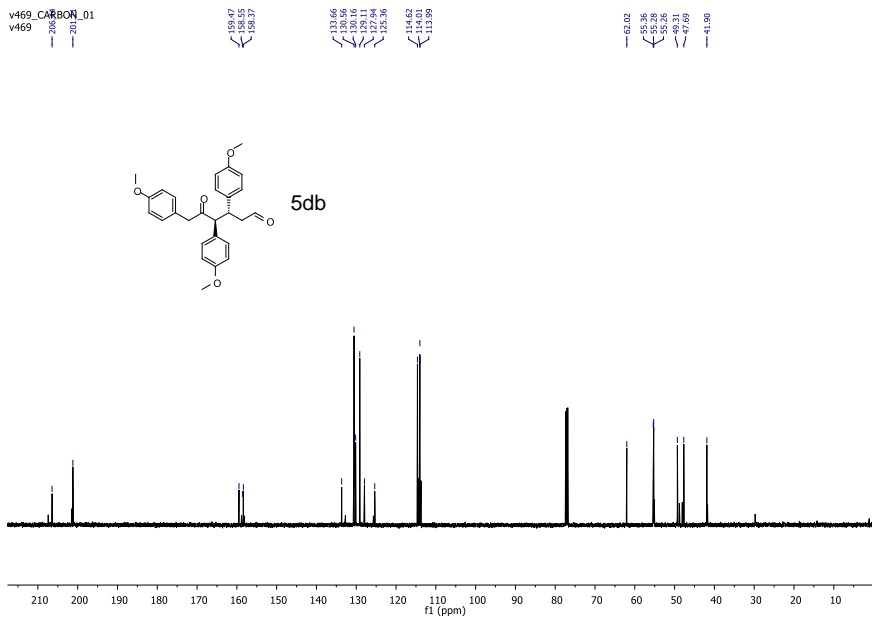





F71\_1\_PROTON\_01

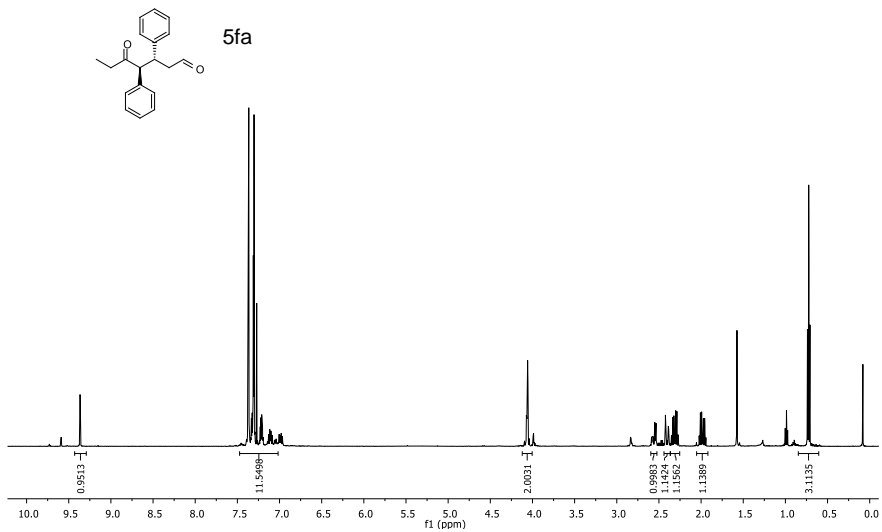

F71\_1\_CARBONE 01

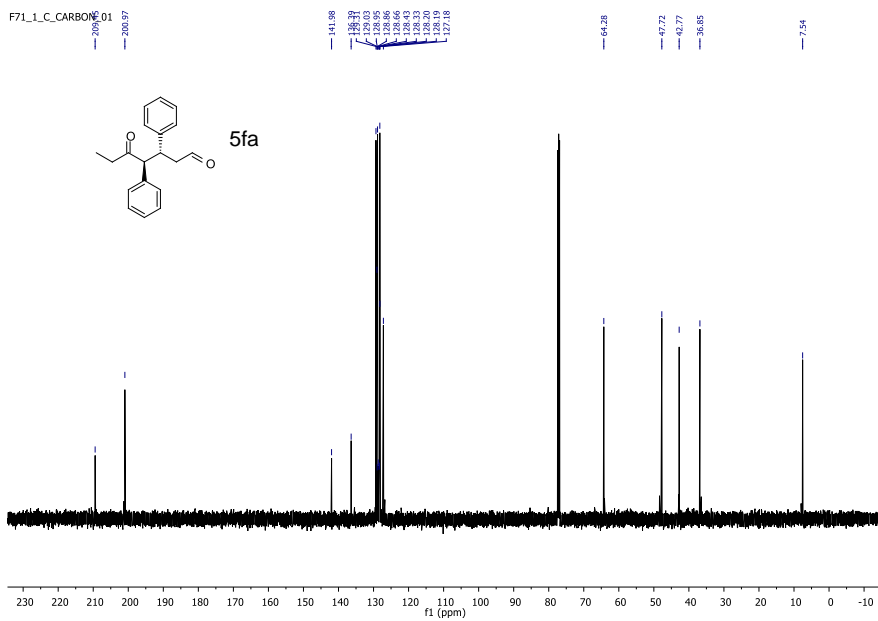

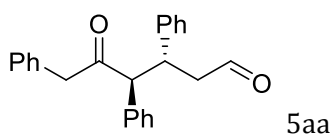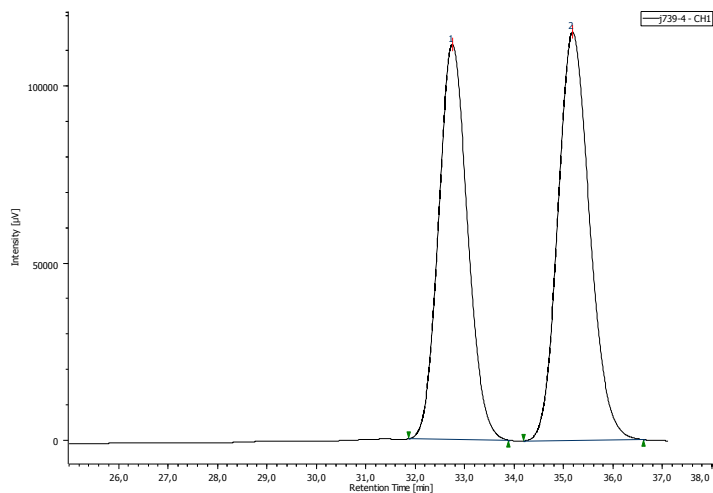

| Peak Name | tR     | Area    | Height | Area%  | Height% | NTP   | Resolution | Symmetry Factor |
|-----------|--------|---------|--------|--------|---------|-------|------------|-----------------|
| 1         | 32,742 | 4526233 | 111394 | 46,887 | 49,183  | 14866 | 2,166      | 1,102           |
| 2         | 35,167 | 5127235 | 115096 | 53,113 | 50,817  | 14436 | N/A        | 1,159           |

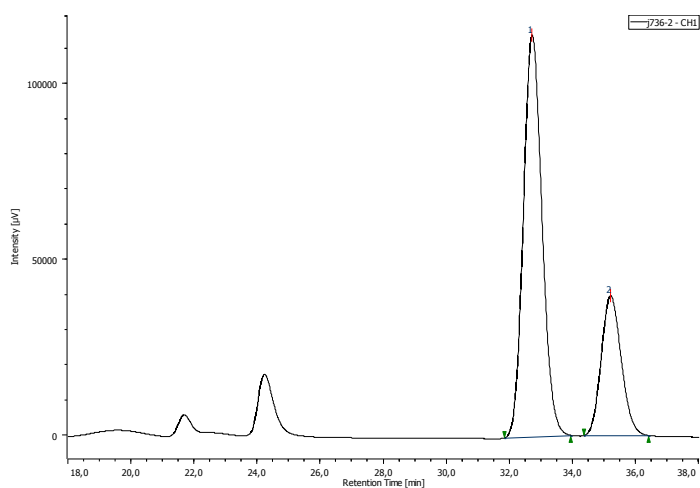

| Peak Name | tR     | Area    | Height | Area%  | Height% | NTP   | Resolution | Symmetry Factor |
|-----------|--------|---------|--------|--------|---------|-------|------------|-----------------|
| 1         | 32,708 | 4679736 | 113972 | 72,812 | 74,186  | 14588 | 2,221      | 1,121           |
| 2         | 35,200 | 1747448 | 39657  | 27,188 | 25,814  | 14563 | N/A        | 1,125           |

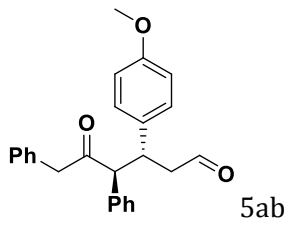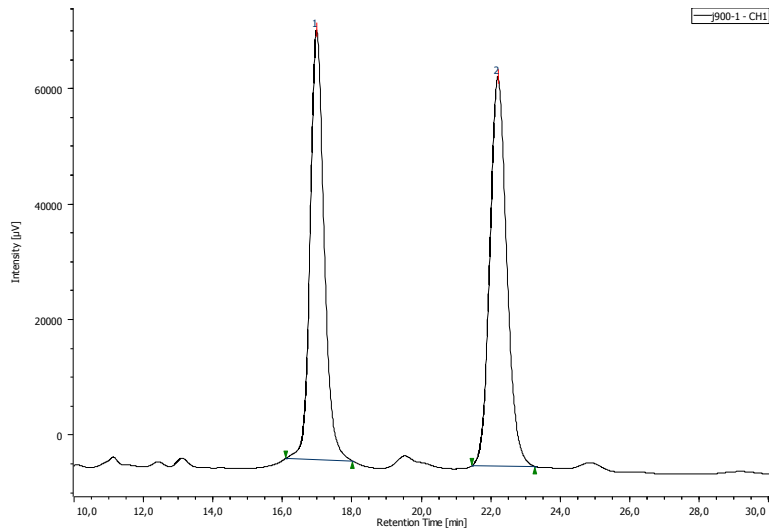

| Peak Name | tR     | Area    | Height | Area%  | Height% | NTP   | Resolution | Symmetry Factor |
|-----------|--------|---------|--------|--------|---------|-------|------------|-----------------|
| 1         | 16,975 | 2070435 | 74274  | 47,621 | 52,444  | 9296  | 6,616      | 1,180           |
| 2         | 22,192 | 2277255 | 67352  | 52,379 | 47,556  | 10244 | N/A        | 1,132           |

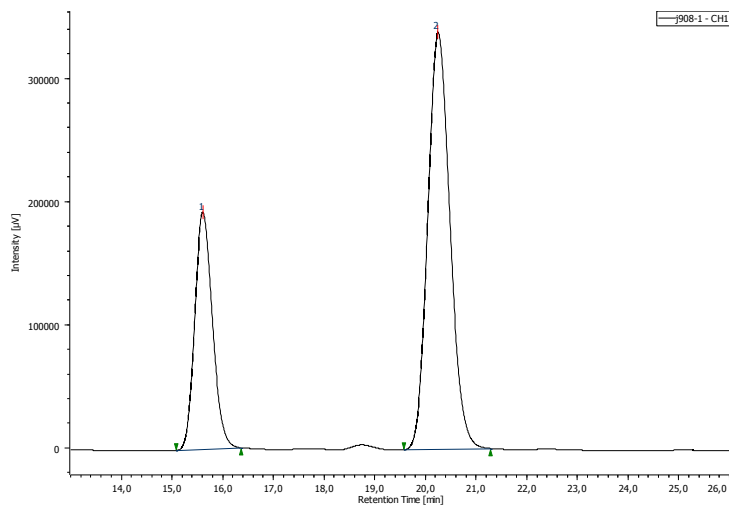

| Peak Name | tR     | Area     | Height | Area%  | Height% | NTP   | Resolution | Symmetry Factor |
|-----------|--------|----------|--------|--------|---------|-------|------------|-----------------|
| 1         | 15,608 | 4651160  | 192279 | 31,143 | 36,253  | 9632  | 6,467      | 1,162           |
| 2         | 20,242 | 10283907 | 338104 | 68,857 | 63,747  | 10229 | N/A        | 1,137           |

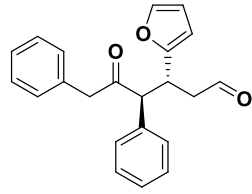

5ac

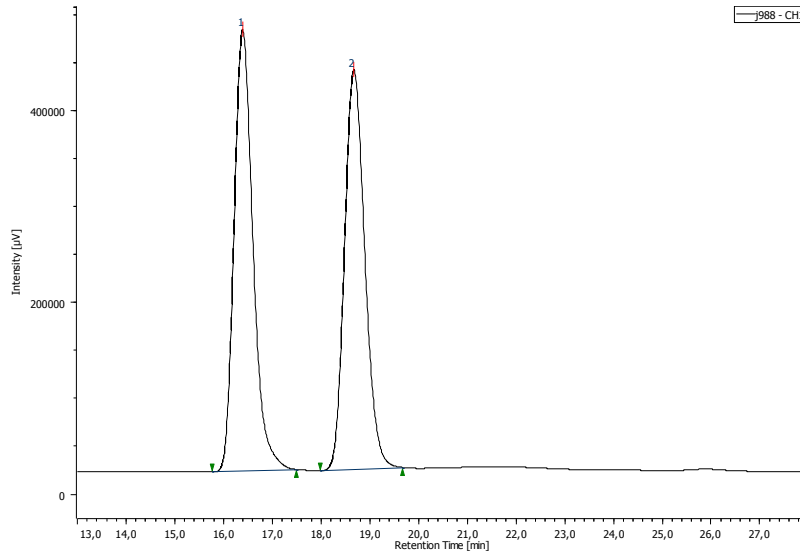

| Peak Name | tR     | Area     | Height | Area%  | Height% | NTP  | Resolution | Symmetry Factor |
|-----------|--------|----------|--------|--------|---------|------|------------|-----------------|
| 1         | 16,383 | 12332352 | 459790 | 50,724 | 52,506  | 9060 | 3,167      | 1,290           |
| 2         | 18,667 | 11980391 | 415901 | 49,276 | 47,494  | 9718 | N/A        | 1,173           |

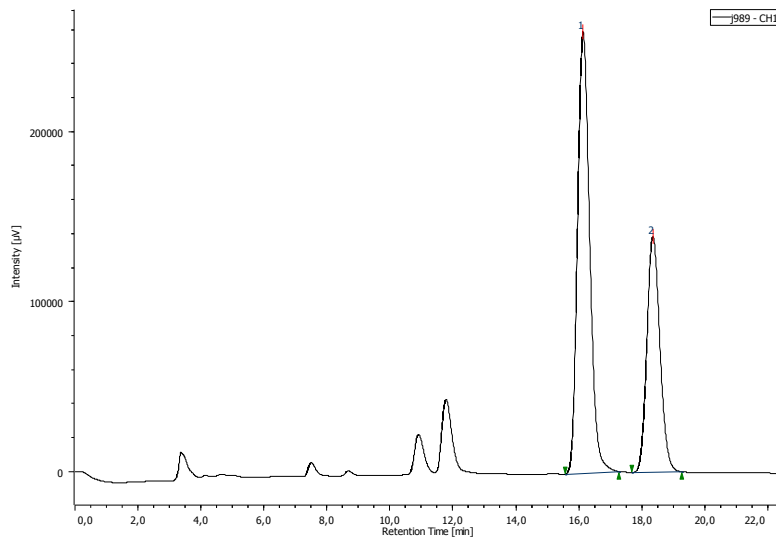

| Peak Name | tR     | Area    | Height | Area%  | Height% | NTP  | Resolution | Symmetry Factor |
|-----------|--------|---------|--------|--------|---------|------|------------|-----------------|
| 1         | 16,117 | 6920367 | 259013 | 63,475 | 65,172  | 8580 | 3,056      | 1,198           |
| 2         | 18,333 | 3982088 | 138415 | 36,525 | 34,828  | 9349 | N/A        | 1,154           |

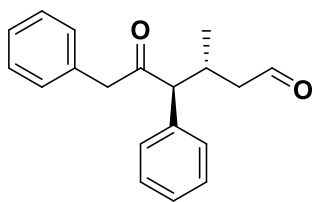

5ad

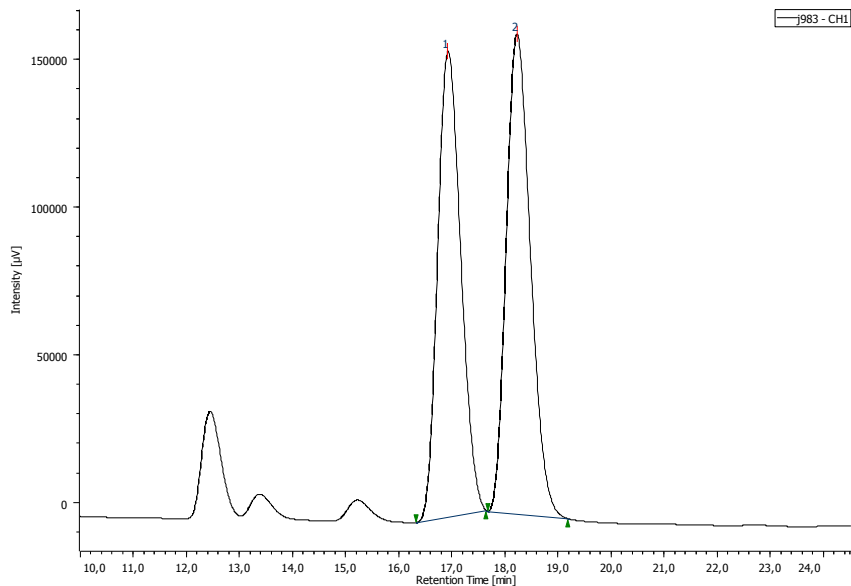

| Peak Name | tR     | Area    | Height | Area%  | Height% | NTP  | Resolution | Symmetry Factor |
|-----------|--------|---------|--------|--------|---------|------|------------|-----------------|
| 1         | 16,917 | 4761603 | 157438 | 48,206 | 49,263  | 6934 | 1,577      | 1,195           |
| 2         | 18,217 | 5115962 | 162152 | 51,794 | 50,737  | 7517 | N/A        | 1,232           |

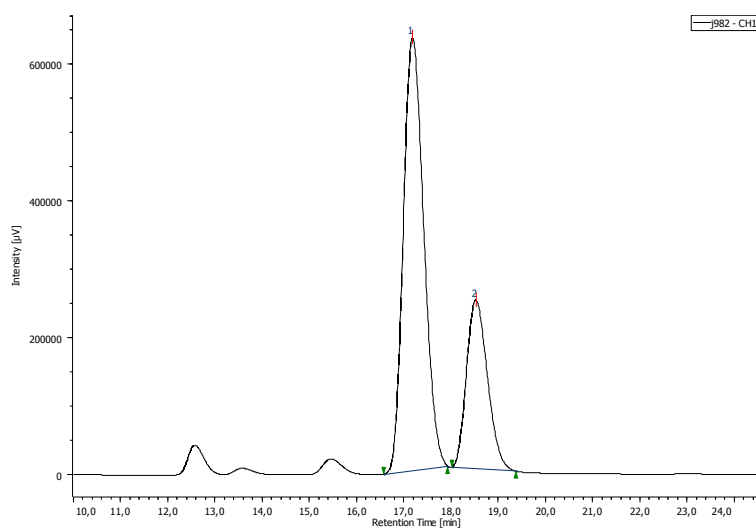

| Peak Name | tR     | Area     | Height | Area%  | Height% | NTP  | Resolution | Symmetry Factor |
|-----------|--------|----------|--------|--------|---------|------|------------|-----------------|
| 1         | 17,175 | 18972461 | 631917 | 71,463 | 72,002  | 7308 | 1,653      | 1,194           |
| 2         | 18,517 | 7576319  | 245726 | 28,537 | 27,998  | 8070 | N/A        | 1,222           |

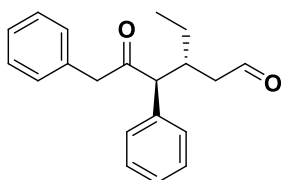

5ae

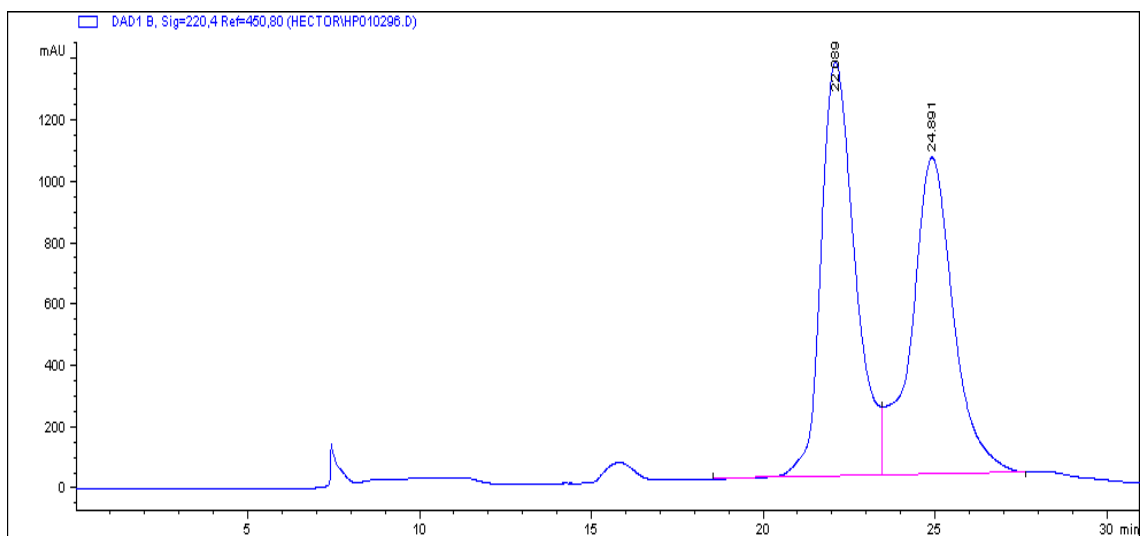

| # | Time   | Area    | Height | Width  | Area%  | Symmetry |
|---|--------|---------|--------|--------|--------|----------|
| 1 | 22.089 | 93484.1 | 1350.3 | 0.8269 | 51.408 | 0.713    |
| 2 | 24.891 | 88364   | 1033   | 1.0523 | 48.592 | 0.893    |

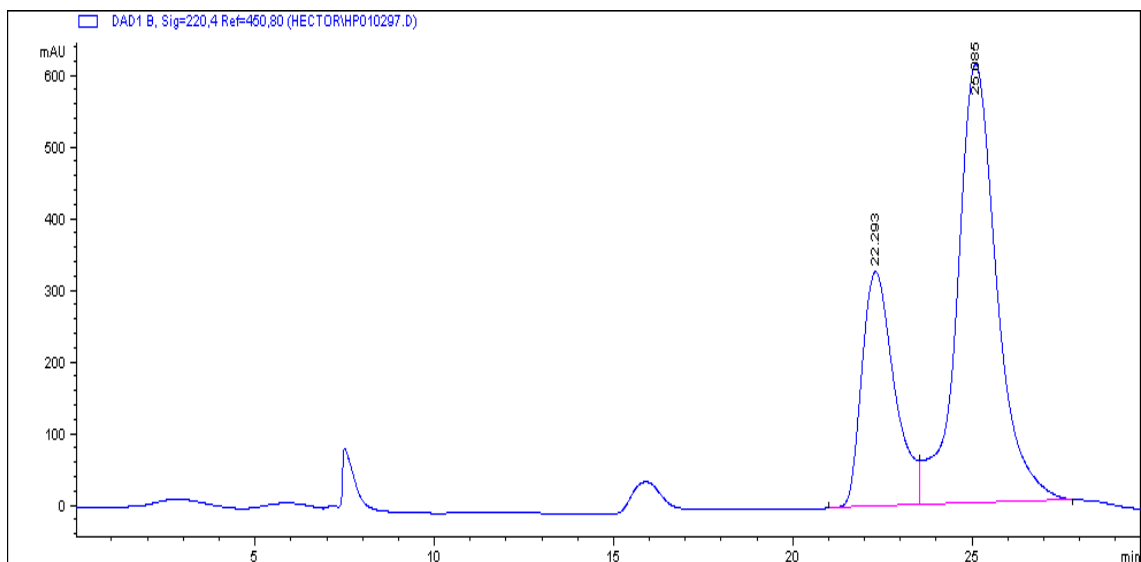

| # | Time   | Area    | Height | Width  | Area%  | Symmetry |
|---|--------|---------|--------|--------|--------|----------|
| 1 | 22.293 | 20807.5 | 328    | 0.9289 | 30.569 | 0.67     |
| 2 | 25.085 | 47259.4 | 612.7  | 1.1079 | 69.431 | 0.857    |

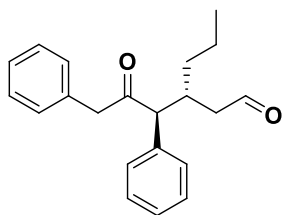

**5af**

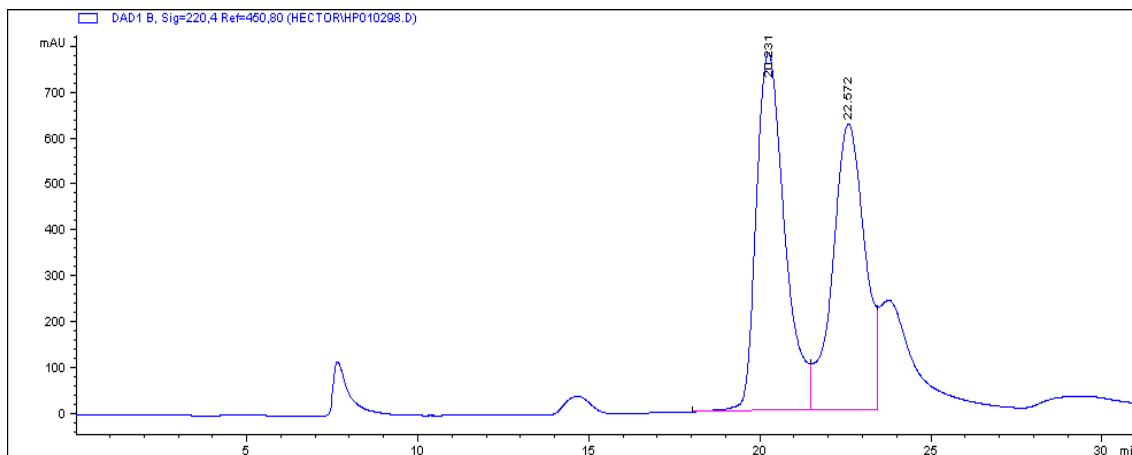

| # | Time   | Area    | Height | Width  | Area%  | Symmetry |
|---|--------|---------|--------|--------|--------|----------|
| 1 | 20.231 | 45188.6 | 778.7  | 0.8818 | 52.516 | 0.698    |
| 2 | 22.572 | 40858.2 | 621.4  | 0.9495 | 47.484 | 0.966    |

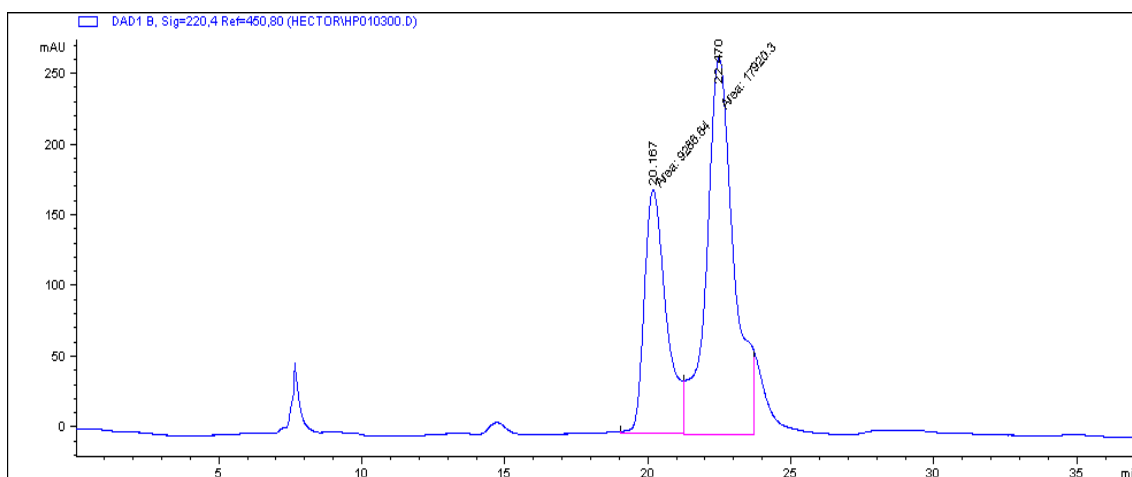

| # | Time   | Area    | Height | Width  | Area%  | Symmetry |
|---|--------|---------|--------|--------|--------|----------|
| 1 | 20.167 | 9286.6  | 172.4  | 0.8976 | 34.133 | 0.654    |
| 2 | 22.47  | 17920.3 | 267.2  | 1.1176 | 65.867 | 0.838    |

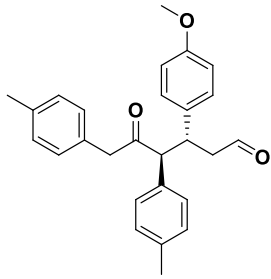

5bb

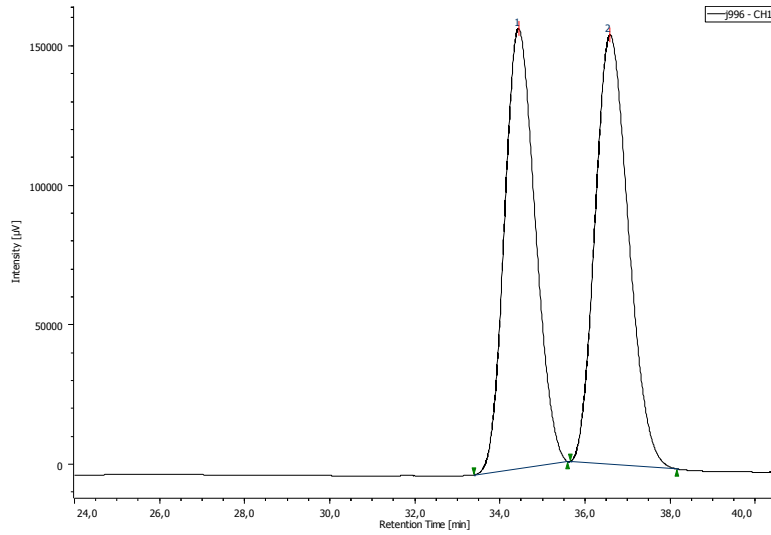

| Peak Name | tR     | Area    | Height | Area%  | Height% | NTP   | Resolution | Symmetry Factor |
|-----------|--------|---------|--------|--------|---------|-------|------------|-----------------|
| 1         | 34,425 | 7881141 | 157333 | 48,525 | 50,603  | 10485 | 1,540      | 1,148           |
| 2         | 36,575 | 8360392 | 153584 | 51,475 | 49,397  | 10103 | N/A        | 1,194           |

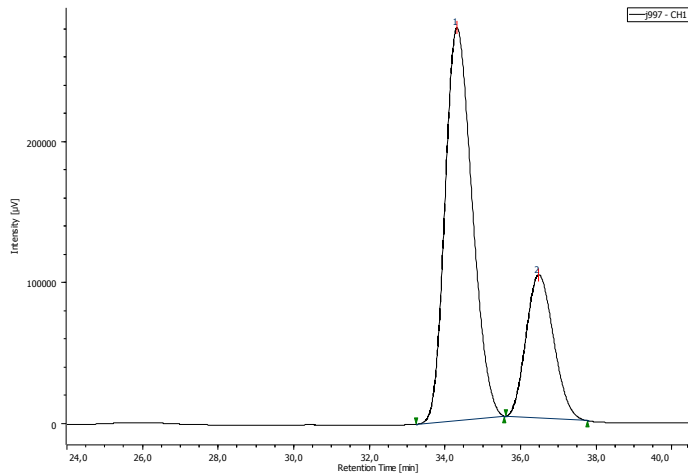

| Peak Name | tR     | Area     | Height | Area%  | Height% | NTP   | Resolution | Symmetry Factor |
|-----------|--------|----------|--------|--------|---------|-------|------------|-----------------|
| 1         | 34,308 | 13830271 | 278146 | 72,909 | 73,260  | 10639 | 1,608      | 1,209           |
| 2         | 36,467 | 5138837  | 101524 | 27,091 | 26,740  | 11485 | N/A        | 1,155           |



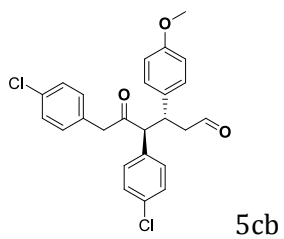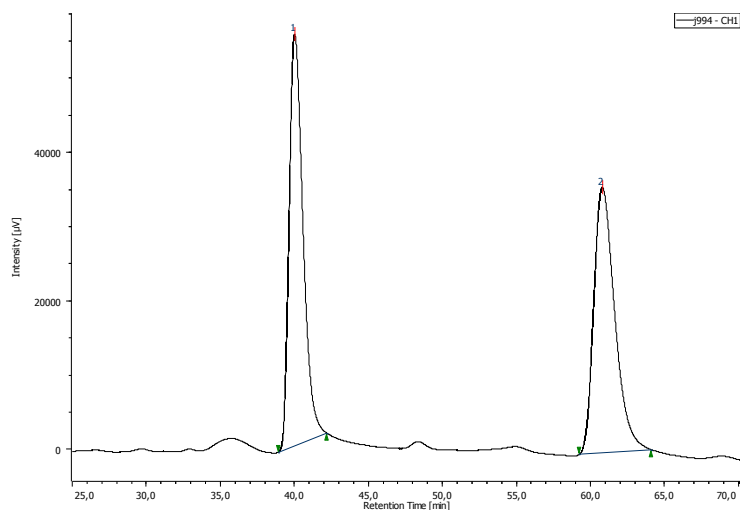

| Peak Name | tR     | Area    | Height | Area%  | Height% | NTP  | Resolution | Symmetry Factor |
|-----------|--------|---------|--------|--------|---------|------|------------|-----------------|
| 1         | 40,017 | 3581665 | 55298  | 50,555 | 60,762  | 8938 | 9,812      | 1,424           |
| 2         | 60,767 | 3503030 | 35709  | 49,445 | 39,238  | 9101 | N/A        | 1,411           |

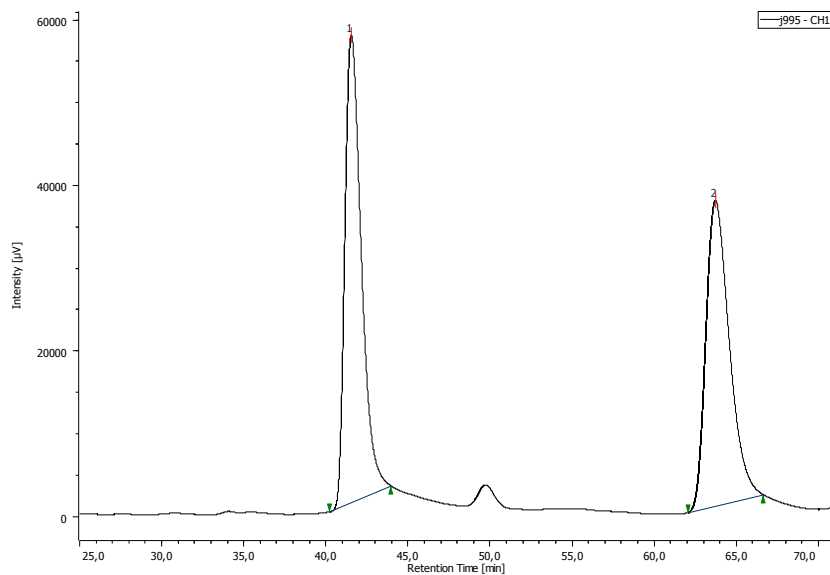

| Peak Name | tR     | Area    | Height | Area%  | Height% | NTP  | Resolution | Symmetry Factor |
|-----------|--------|---------|--------|--------|---------|------|------------|-----------------|
| 1         | 41,542 | 4503879 | 57353  | 52,606 | 60,374  | 8229 | 9,909      | 1,966           |
| 2         | 63,692 | 4057622 | 37643  | 47,394 | 39,626  | 9235 | N/A        | 1,699           |

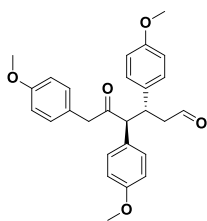

5db

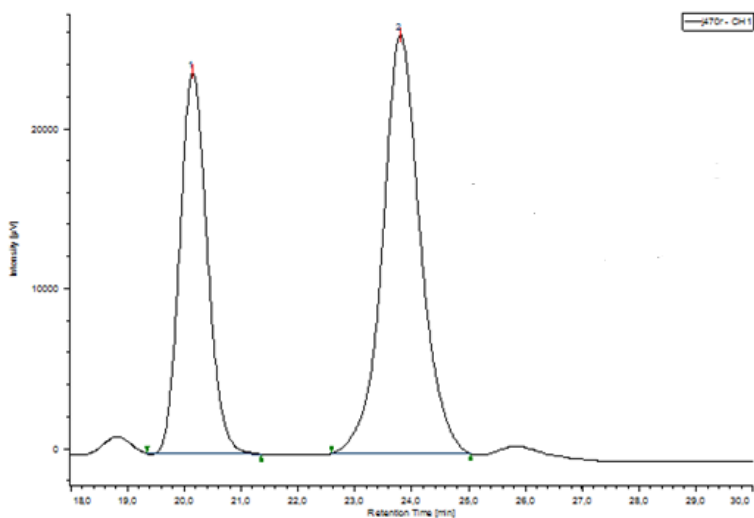

| Peak Name | tR     | Area    | Height | Area%  | Height% | Resolution | Symmetry Factor |
|-----------|--------|---------|--------|--------|---------|------------|-----------------|
| 1         | 20,150 | 795966  | 23821  | 39,773 | 47,665  | 3,608      | 1,127           |
| 2         | 23,800 | 1205330 | 26155  | 60,227 | 52,335  | N/A        | 1,044           |

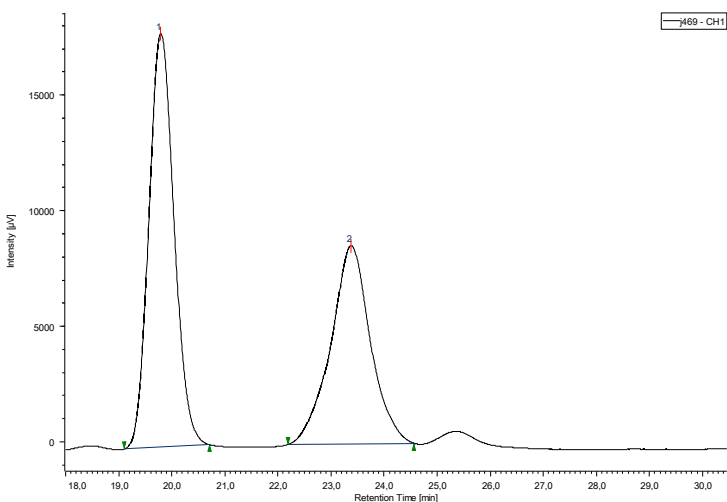

| PeakName | tR     | Area   | Height | Area%  | Height% | NTP  | Resolution | Symmetry Factor |
|----------|--------|--------|--------|--------|---------|------|------------|-----------------|
| 1        | 19,792 | 587718 | 17853  | 56,997 | 67,583  | 8298 | 3,338      | 1,120           |
| 2        | 23,375 | 443424 | 8563   | 43,003 | 32,417  | 5306 | N/A        | 0,983           |

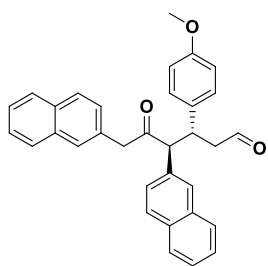

5b

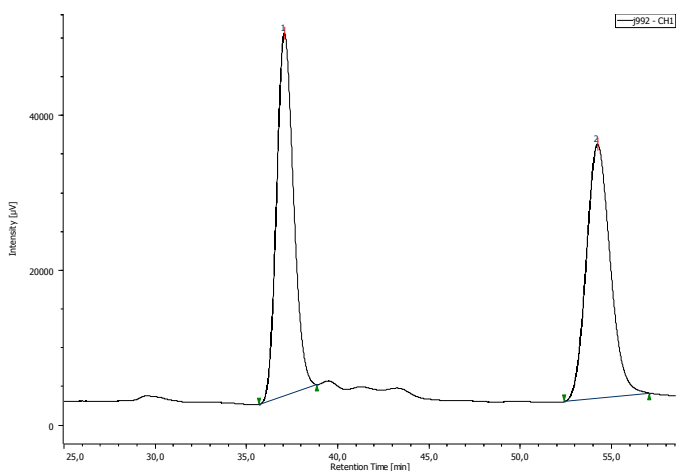

| Peak Name | tR     | Area    | Height | Area%  | Height% | NTP  | Resolution | Symmetry Factor |
|-----------|--------|---------|--------|--------|---------|------|------------|-----------------|
| 1         | 37,067 | 3014696 | 46702  | 50,384 | 58,803  | 7582 | 8,419      | 1,165           |
| 2         | 54,208 | 2968745 | 32719  | 49,616 | 41,197  | 8298 | N/A        | 1,148           |

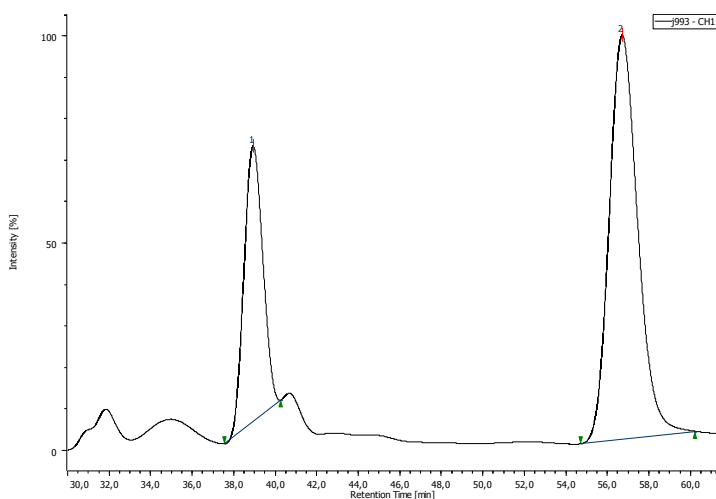

| Peak Name | tR     | Area    | Height | Area%  | Height% | NTP  | Resolution | Symmetry Factor |
|-----------|--------|---------|--------|--------|---------|------|------------|-----------------|
| 1         | 38,925 | 3313400 | 52793  | 31,026 | 40,549  | 8307 | 8,507      | 1,071           |
| 2         | 56,683 | 7366052 | 77401  | 68,974 | 59,451  | 8374 | N/A        | 1,196           |

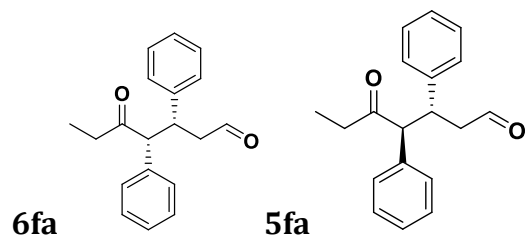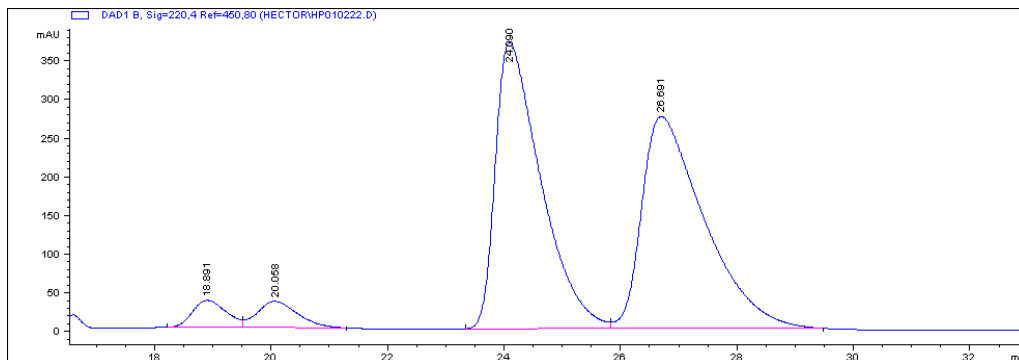

| # | Time   | Area    | Height | Width  | Area%  | Symmetry |
|---|--------|---------|--------|--------|--------|----------|
| 1 | 18.891 | 1471.2  | 35.6   | 0.5718 | 3.350  | 0.735    |
| 2 | 20.058 | 1692.3  | 34.6   | 0.6056 | 3.853  | 0.736    |
| 3 | 24.09  | 20169.2 | 370.4  | 0.7728 | 45.926 | 0.431    |
| 4 | 26.691 | 20583.7 | 274.8  | 1.0052 | 46.870 | 0.428    |

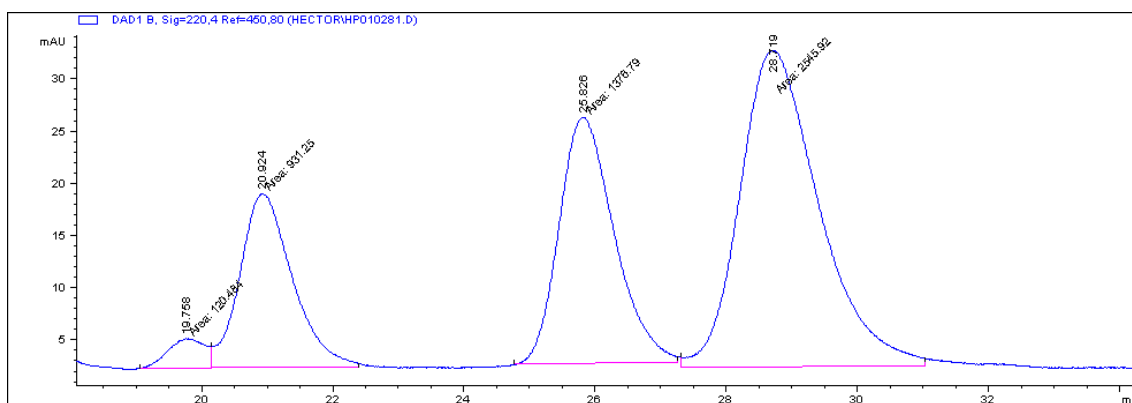

| # | Time   | Area   | Height | Width  | Area%  | Symmetry |
|---|--------|--------|--------|--------|--------|----------|
| 1 | 19.758 | 120.5  | 2.9    | 0.6808 | 2.422  | 0.982    |
| 2 | 20.924 | 931.2  | 16.7   | 0.9302 | 18.721 | 0.741    |
| 3 | 25.826 | 1376.8 | 23.6   | 0.9731 | 27.677 | 0.801    |
| 4 | 28.719 | 2545.9 | 30.4   | 1.3978 | 51.180 | 0.734    |

4aa

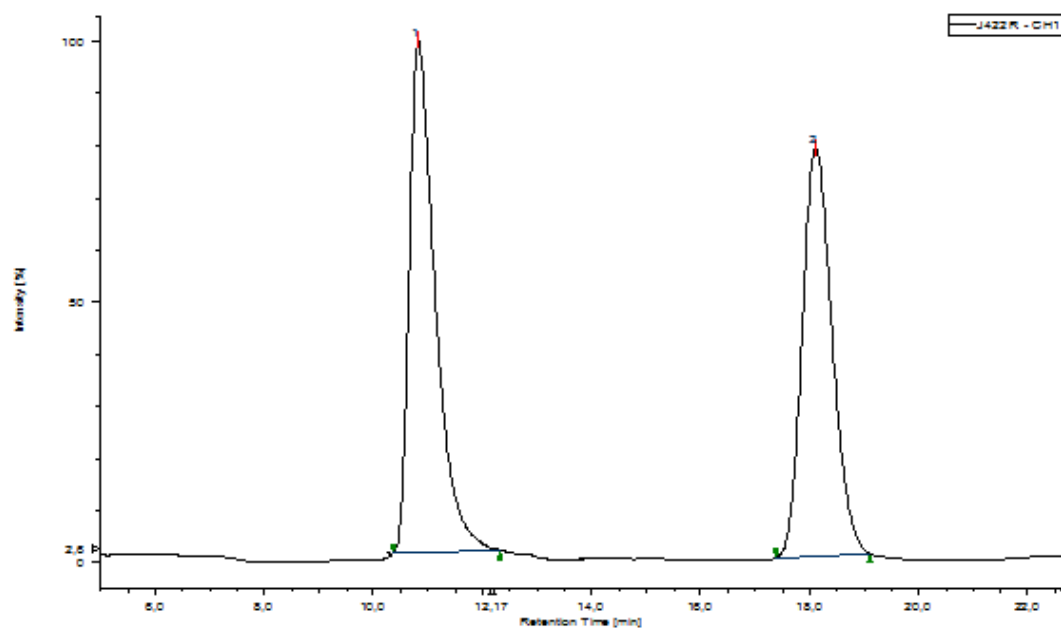

| Peak Name | tR     | Area    | Height | Area%  | Height% | Resolution | Symmetry Factor |
|-----------|--------|---------|--------|--------|---------|------------|-----------------|
| 1         | 10,817 | 1177031 | 35457  | 52,295 | 55,614  | 7,893      | 1,738           |
| 2         | 18,092 | 1073725 | 28298  | 47,705 | 44,386  | N/A        | 1,185           |

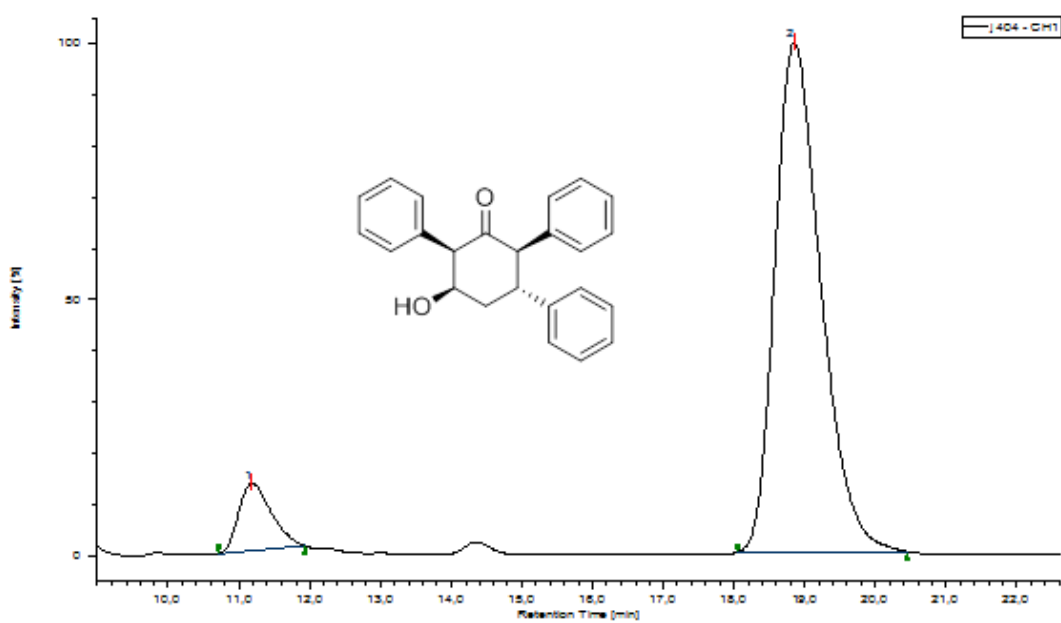

| Peak Name | tR     | Area    | Height | Area%  | Height% | Resolution | Symmetry Factor |
|-----------|--------|---------|--------|--------|---------|------------|-----------------|
| 1         | 11,183 | 686694  | 21326  | 8,653  | 11,714  | 7,533      | 1,373           |
| 2         | 18,842 | 7249016 | 160729 | 91,347 | 88,286  | N/A        | 1,333           |

4ab

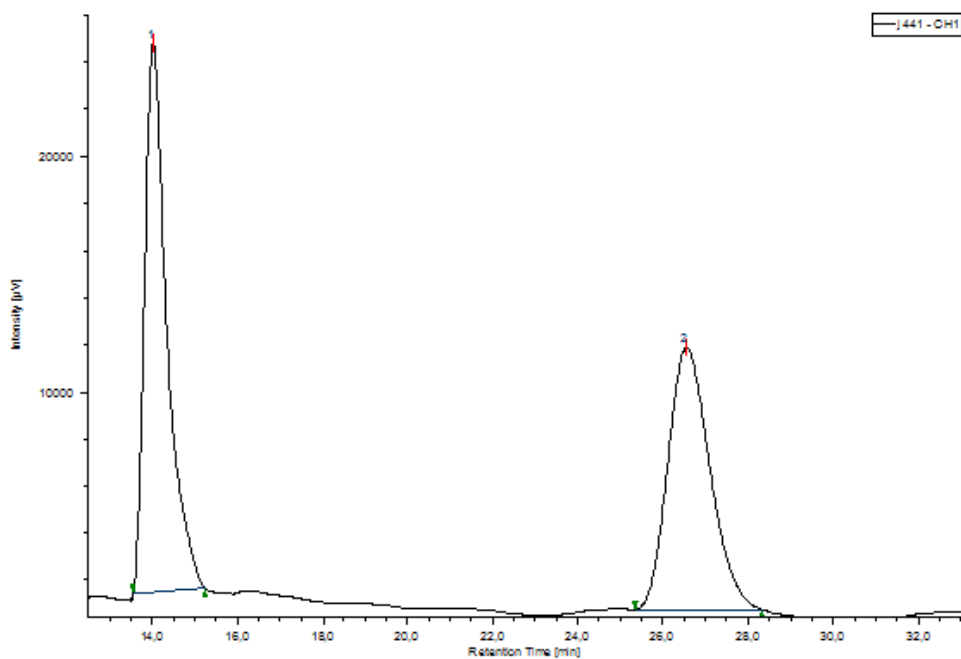

| Peak Name | tR     | Area   | Height | Area%  | Height% | Resolution | Symmetry Factor |
|-----------|--------|--------|--------|--------|---------|------------|-----------------|
| 1         | 14,017 | 854516 | 23334  | 52,798 | 67,689  | 9,237      | 1,653           |
| 2         | 26,533 | 763945 | 11138  | 47,202 | 32,311  | N/A        | 1,225           |

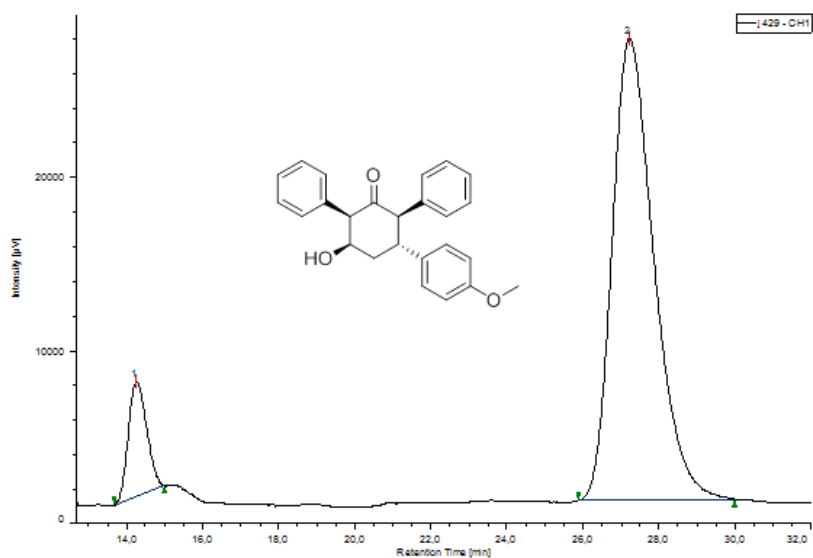

| Peak Name | tR     | Area    | Height | Area%  | Height% | Resolution | Symmetry Factor |
|-----------|--------|---------|--------|--------|---------|------------|-----------------|
| 1         | 14,267 | 221893  | 6612   | 9,868  | 19,877  | 8,997      | 1,147           |
| 2         | 27,208 | 2026734 | 26655  | 90,132 | 80,123  | N/A        | 1,344           |

4ac

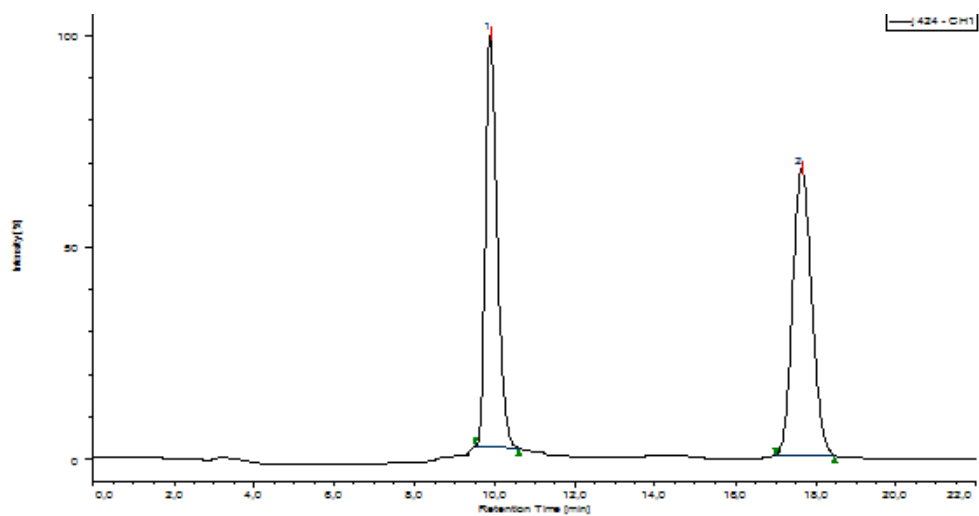

| Peak | tR     | Area   | Height | Area%  | Height% | Resolution | Symmetry Factor |
|------|--------|--------|--------|--------|---------|------------|-----------------|
| 1    | 9,883  | 887984 | 43404  | 47,175 | 58,982  | 11,043     | 1,328           |
| 2    | 17,633 | 994353 | 30185  | 52,825 | 41,018  | N/A        | 1,101           |

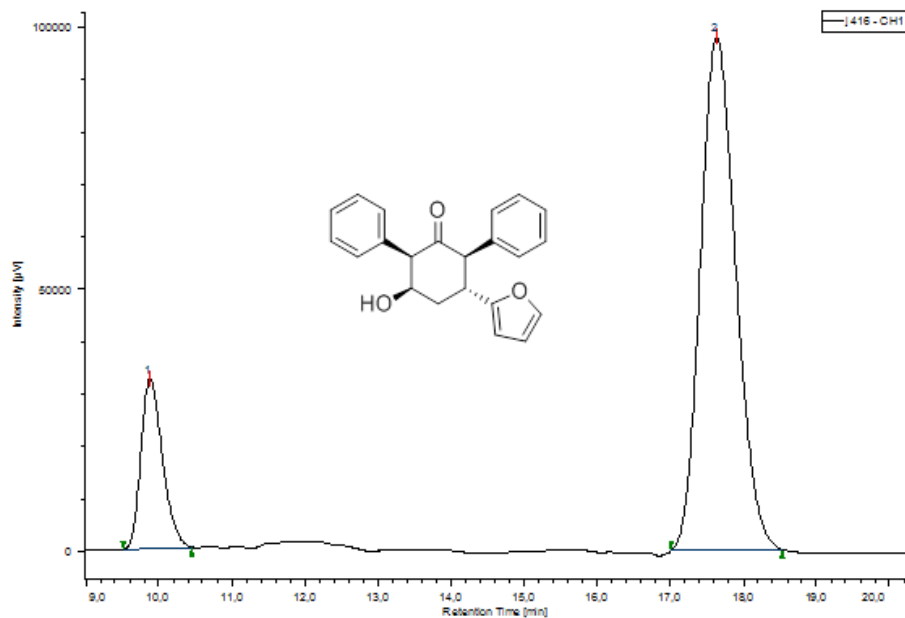

| Peak Name | tR     | Area    | Height | Area%  | Height% | Resolution | Symmetry Factor |
|-----------|--------|---------|--------|--------|---------|------------|-----------------|
| 1         | 9,883  | 662104  | 32221  | 16,838 | 24,848  | 10,848     | 1,286           |
| 2         | 17,625 | 3270099 | 97451  | 83,162 | 75,152  | N/A        | 1,166           |

4ad

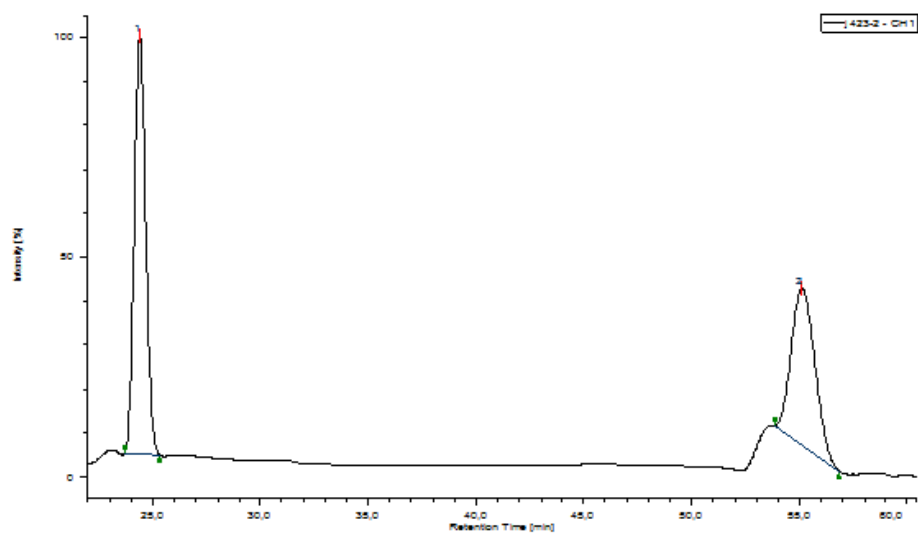

| Peak Name | tR     | Area   | Height | Area%  | Height% | Resolution | Symmetry Factor |
|-----------|--------|--------|--------|--------|---------|------------|-----------------|
| 1         | 24,408 | 355468 | 9759   | 56,165 | 72,733  | 20,284     | 1,085           |
| 2         | 55,092 | 277426 | 3658   | 43,835 | 27,267  | N/A        | 1,104           |

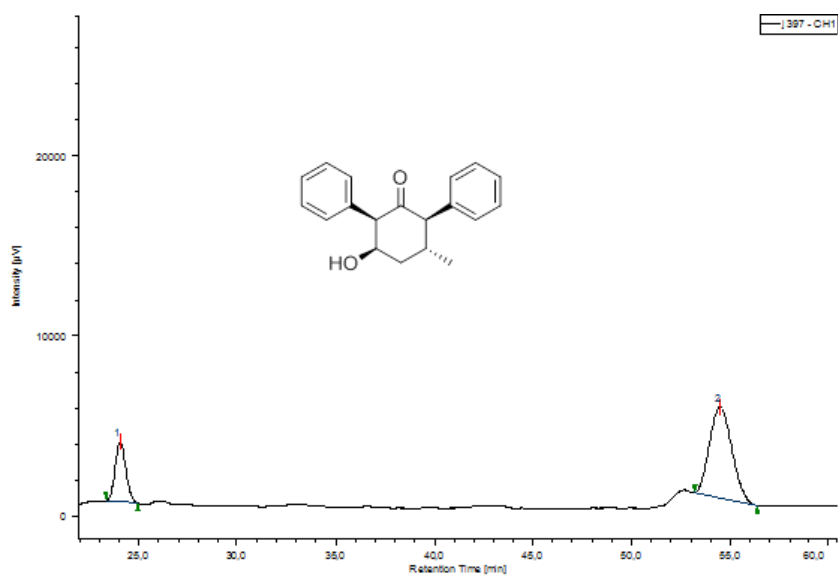

| Peak Name | tR     | Area   | Height | Area%  | Height% | NTP   | Resolution | Symmetry Factor |
|-----------|--------|--------|--------|--------|---------|-------|------------|-----------------|
| 1         | 24,058 | 124074 | 3342   | 23,919 | 39,777  | 9642  | 19,737     | 1,127           |
| 2         | 54,450 | 394650 | 5060   | 76,081 | 60,223  | 10676 | N/A        | 1,133           |



4ae

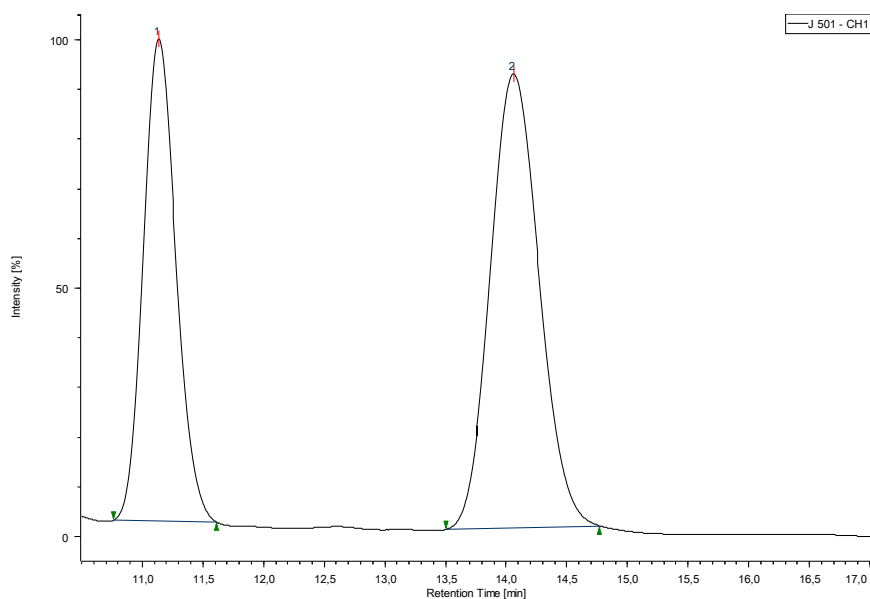

| Peak Name | tR     | Area    | Height | Area%  | Height% | NTP  | Resolution | Symmetry Factor |
|-----------|--------|---------|--------|--------|---------|------|------------|-----------------|
| 1         | 11,133 | 767165  | 40950  | 41,615 | 51,520  | 8080 | 4,728      | 1,147           |
| 2         | 14,058 | 1076302 | 38534  | 58,385 | 48,480  | 5694 | N/A        | 1,105           |

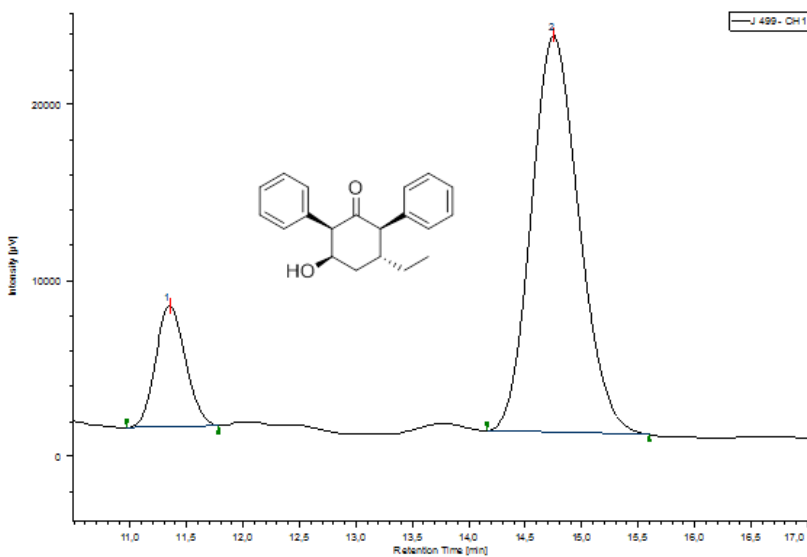

| Peak Name | tR     | Area   | Height | Area%  | Height% | NTP  | Resolution | Symmetry Factor |
|-----------|--------|--------|--------|--------|---------|------|------------|-----------------|
| 1         | 11,350 | 126714 | 6889   | 16,101 | 23,444  | 8565 | 5,376      | 1,098           |
| 2         | 14,742 | 660296 | 22496  | 83,899 | 76,556  | 5794 | N/A        | 1,146           |

4af

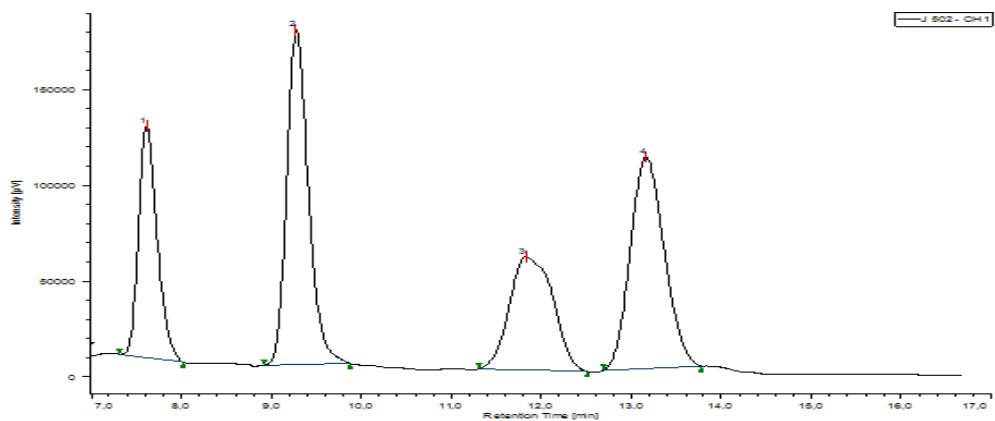

| Peak Name | tR     | Area    | Height | Area%  | Height% | NTP  | Resolution | Symmetry Factor |
|-----------|--------|---------|--------|--------|---------|------|------------|-----------------|
| 1         | 7,617  | 1732325 | 120890 | 18,199 | 25,995  | 6690 | 4,149      | 1,261           |
| 3         | 9,275  | 2912013 | 174687 | 30,593 | 37,562  | 7481 | 3,758      | 1,248           |
| 2         | 11,825 | 1977845 | 59023  | 20,779 | 12,692  | 2577 | 1,636      | 1,157           |
| 4         | 13,158 | 2896462 | 110458 | 30,429 | 23,751  | 5612 | N/A        | 1,123           |

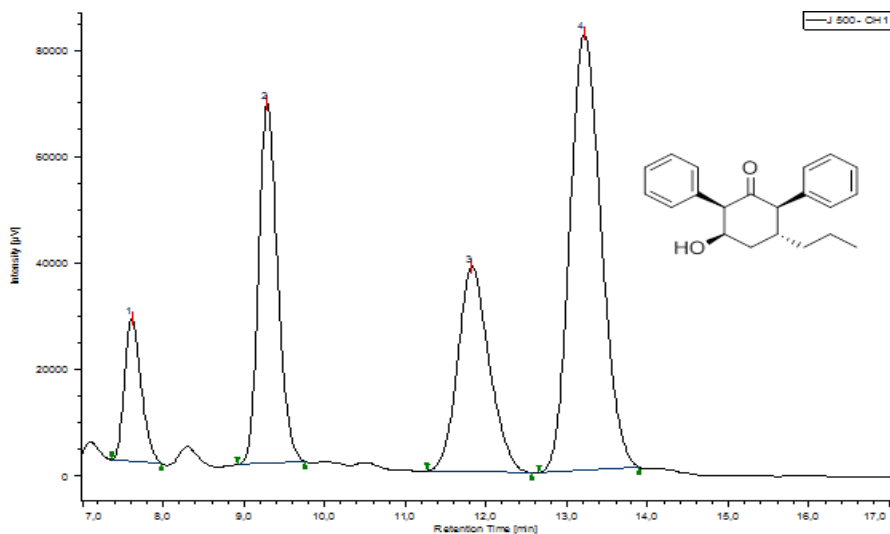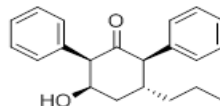

| Peak Name | tR     | Area    | Height | Area%  | Height% | NTP  | Resolution | Symmetry Factor |
|-----------|--------|---------|--------|--------|---------|------|------------|-----------------|
| 1         | 7,608  | 384677  | 26636  | 8,133  | 12,435  | 6380 | 4,168      | 1,301           |
| 3         | 9,283  | 1098167 | 67424  | 23,218 | 31,477  | 7637 | 4,505      | 1,213           |
| 2         | 11,817 | 1042870 | 38469  | 22,049 | 17,960  | 4524 | 1,966      | 1,152           |
| 4         | 13,208 | 2204043 | 81670  | 46,599 | 38,128  | 5439 | N/A        | 1,146           |

4bb

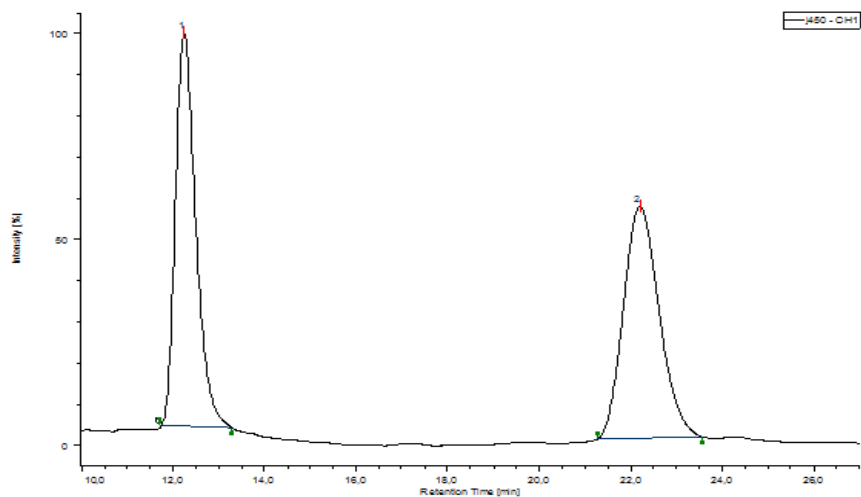

| Peak Name | tR     | Area    | Height | Area%  | Height% | Resolution | Symmetry Factor |
|-----------|--------|---------|--------|--------|---------|------------|-----------------|
| 1         | 12,242 | 1236528 | 39965  | 49,216 | 62,922  | 8,901      | 1,354           |
| 2         | 22,183 | 1275912 | 23550  | 50,784 | 37,078  | N/A        | 1,189           |

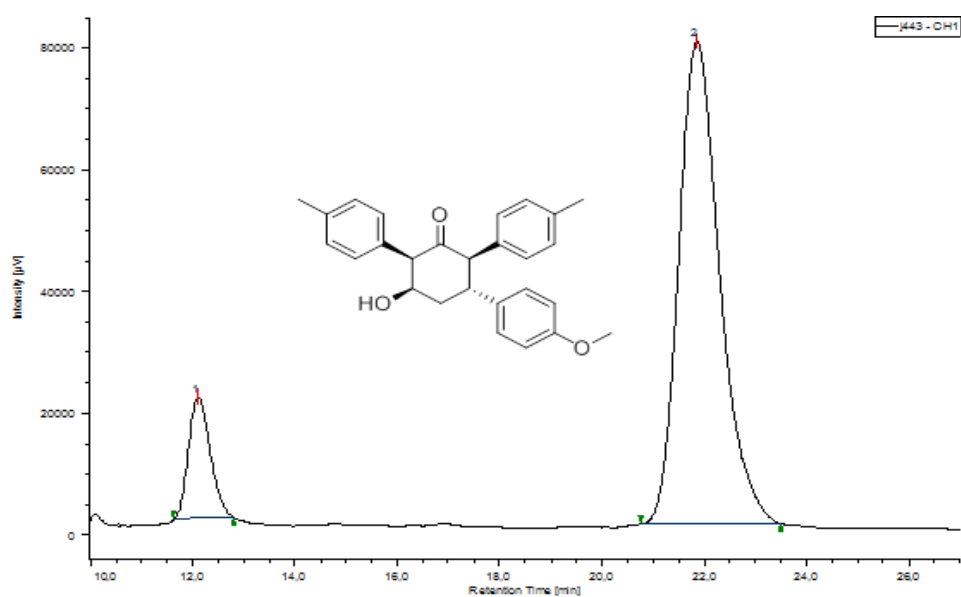

| Peak Name | tR     | Area    | Height | Area%  | Height% | Resolution | Symmetry Factor |
|-----------|--------|---------|--------|--------|---------|------------|-----------------|
| 1         | 12,100 | 585686  | 19873  | 11,808 | 20,096  | 8,815      | 1,248           |
| 2         | 21,842 | 4374380 | 79017  | 88,192 | 79,904  | N/A        | 1,276           |

4cb

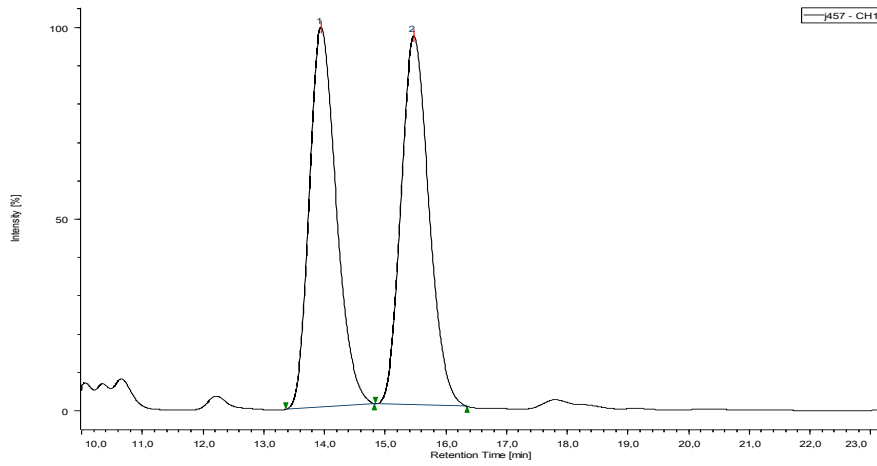

| Peak Name | tR     | Area    | Height | Area%  | Height% | Resolution | Symmetry Factor |
|-----------|--------|---------|--------|--------|---------|------------|-----------------|
| 1         | 13,942 | 6482107 | 210153 | 49,887 | 50,746  | 1,847      | 1,262           |
| 2         | 15,467 | 6511583 | 203974 | 50,113 | 49,254  | N/A        | 1,179           |

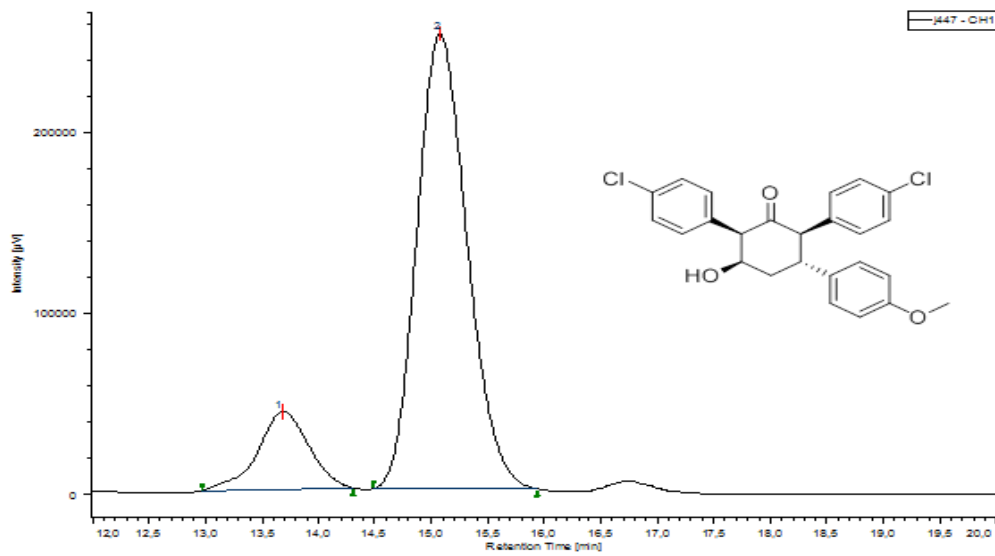

| Peak Name | tR     | Area    | Height | Area%  | Height% | Resolution | Symmetry Factor |
|-----------|--------|---------|--------|--------|---------|------------|-----------------|
| 1         | 13,683 | 1355910 | 43008  | 14,891 | 14,631  | 1,728      | 0,930           |
| 2         | 15,075 | 7749869 | 250940 | 85,109 | 85,369  | N/A        | 1,166           |

4eb

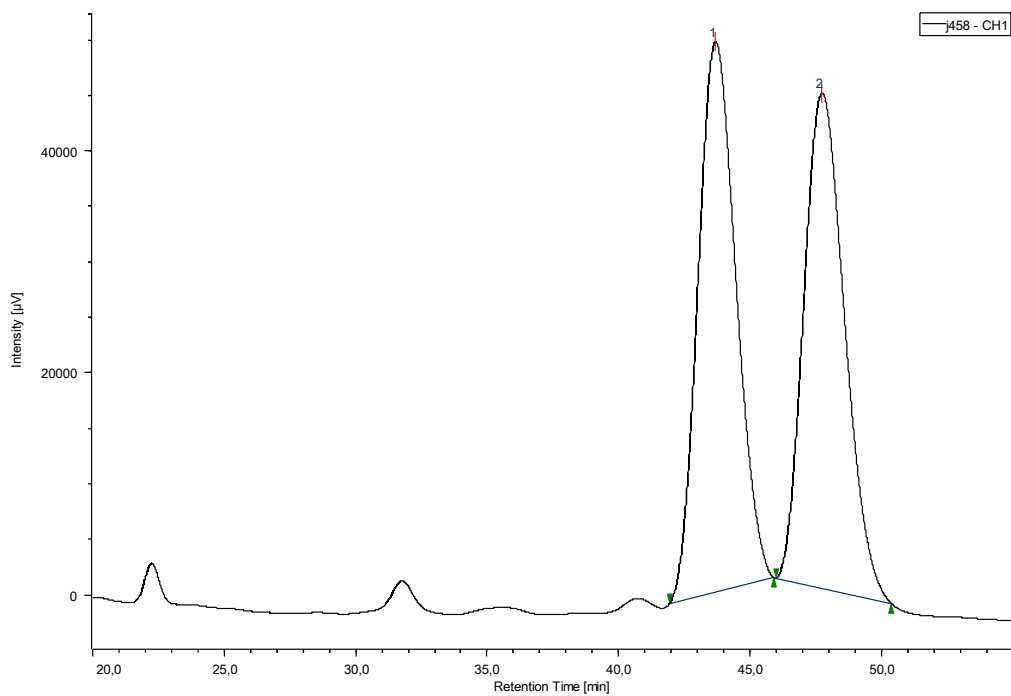

| Peak Name | tR     | Area    | Height | Area%  | Height% | Resolution | Symmetry Factor |
|-----------|--------|---------|--------|--------|---------|------------|-----------------|
| 1         | 43,667 | 4967320 | 49482  | 50,887 | 52,627  | 1,452      | 1,133           |
| 2         | 47,708 | 4794141 | 44542  | 49,113 | 47,373  | N/A        | 1,212           |

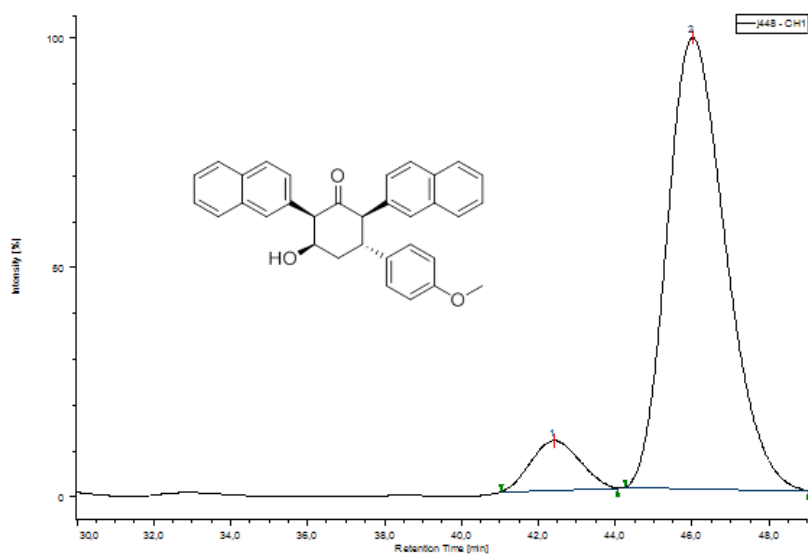

| Peak Name | tR     | Area     | Height | Area%  | Height% | Resolution | Symmetry Factor |
|-----------|--------|----------|--------|--------|---------|------------|-----------------|
| 1         | 42,408 | 1003937  | 11304  | 8,397  | 9,837   | 1,369      | 1,074           |
| 2         | 46,000 | 10951905 | 103613 | 91,603 | 90,163  | N/A        | 1,250           |

4ib

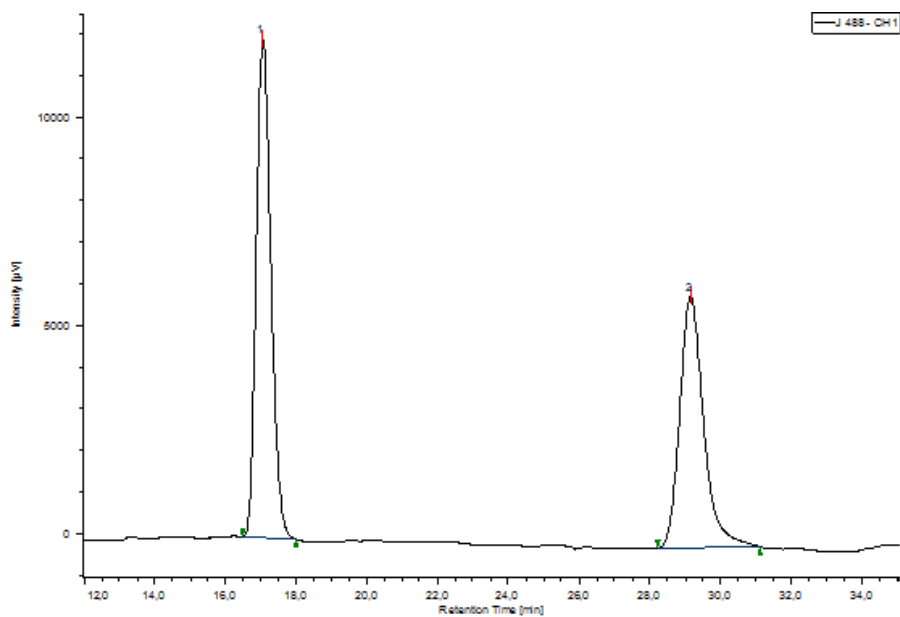

| Peak Name | tR     | Area   | Height | Area%  | Height% | NTP  | Resolution | Symmetry Factor |
|-----------|--------|--------|--------|--------|---------|------|------------|-----------------|
| 1         | 17,058 | 343879 | 11969  | 54,749 | 66,485  | 8123 | 12,477     | 1,190           |
| 2         | 29,142 | 284219 | 6034   | 45,251 | 33,515  | 9676 | N/A        | 1,290           |

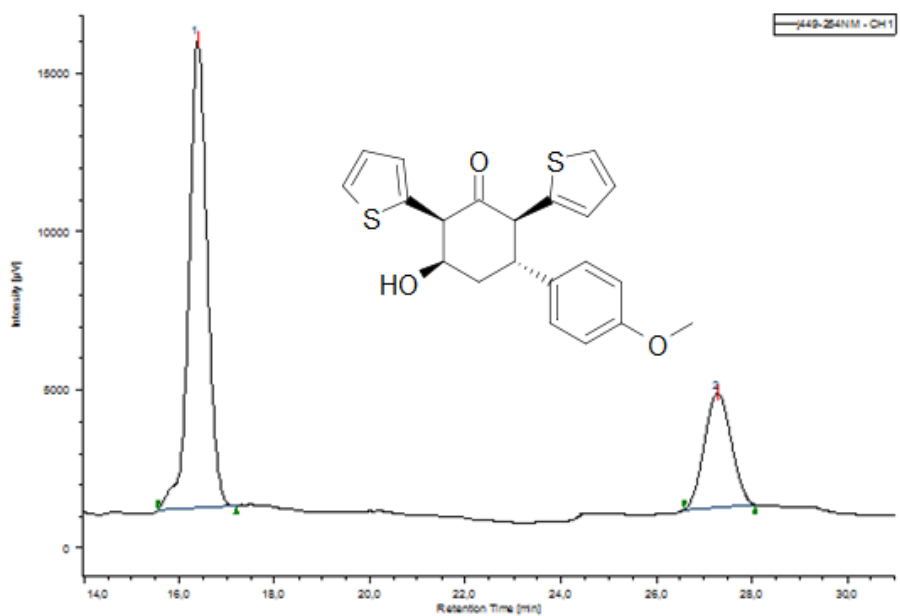

| Peak Name | tR     | Area   | Height | Area%  | Height% | NTP   | Resolution | Symmetry Factor |
|-----------|--------|--------|--------|--------|---------|-------|------------|-----------------|
| 1         | 16,392 | 396173 | 14764  | 73,830 | 80,351  | 9178  | 12,545     | 0,971           |
| 2         | 27,267 | 140429 | 3610   | 26,170 | 19,649  | 10709 | N/A        | 1,048           |

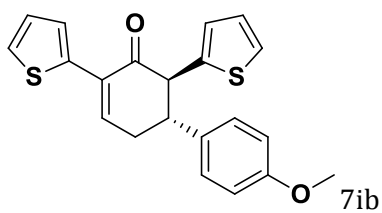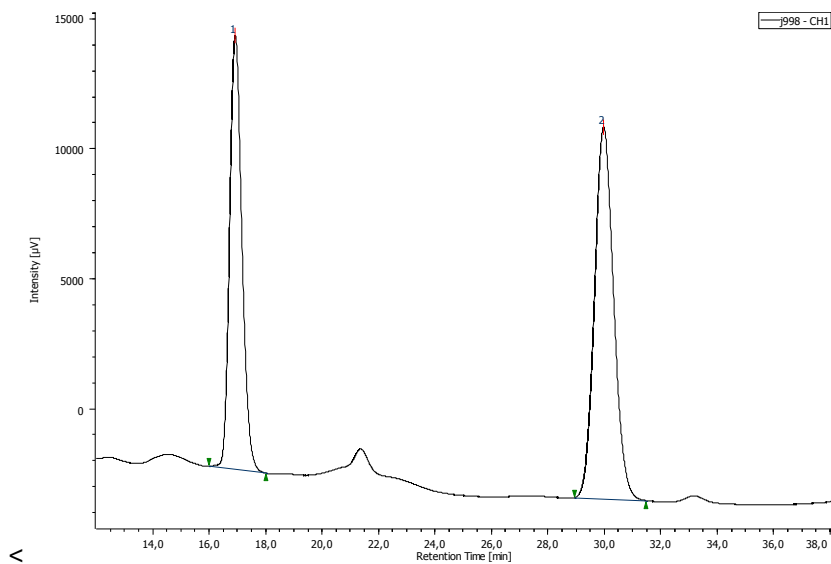

| Peak Name | tR     | Area   | Height | Area%  | Height% | NTP  | Resolution | Symmetry Factor |
|-----------|--------|--------|--------|--------|---------|------|------------|-----------------|
| 1         | 16,925 | 502209 | 16660  | 42,777 | 53,830  | 7378 | 12,899     | 1,179           |
| 2         | 29,950 | 671808 | 14289  | 57,223 | 46,170  | 9382 | N/A        | 1,111           |

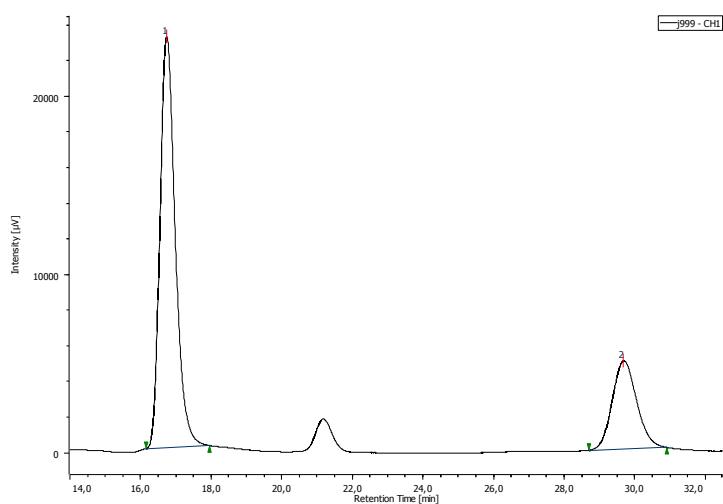

| Peak Name | tR     | Area   | Height | Area%  | Height% | NTP  | Resolution | Symmetry Factor |
|-----------|--------|--------|--------|--------|---------|------|------------|-----------------|
| 1         | 16,742 | 690746 | 23025  | 74,448 | 82,343  | 7496 | 12,737     | 1,276           |
| 2         | 29,667 | 237079 | 4937   | 25,552 | 17,657  | 8850 | N/A        | 1,135           |

7hb

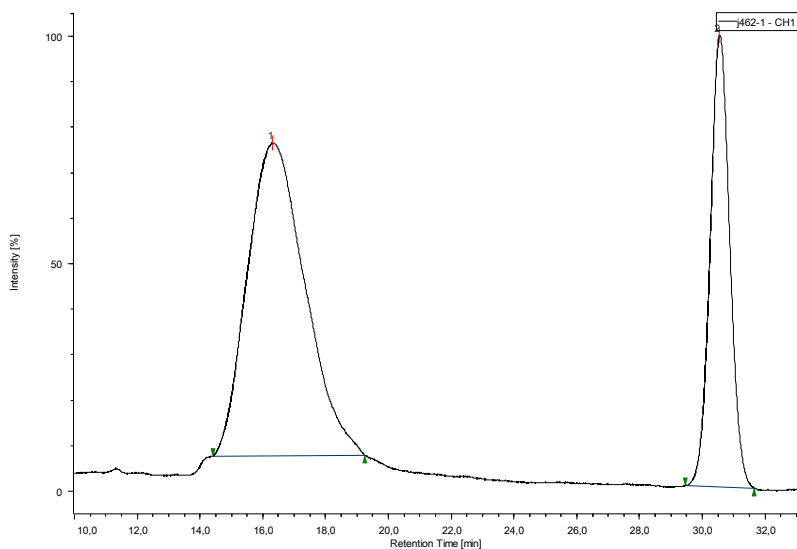

| Peak Name | tR     | Area   | Height | Area%  | Height% | NTP   | Resolution | Symmetry Factor |
|-----------|--------|--------|--------|--------|---------|-------|------------|-----------------|
| 1         | 16,308 | 222185 | 1748   | 66,963 | 40,933  | 354   | 6,192      | 1,267           |
| 2         | 30,525 | 109620 | 2523   | 33,037 | 59,067  | 11532 | N/A        | 1,045           |

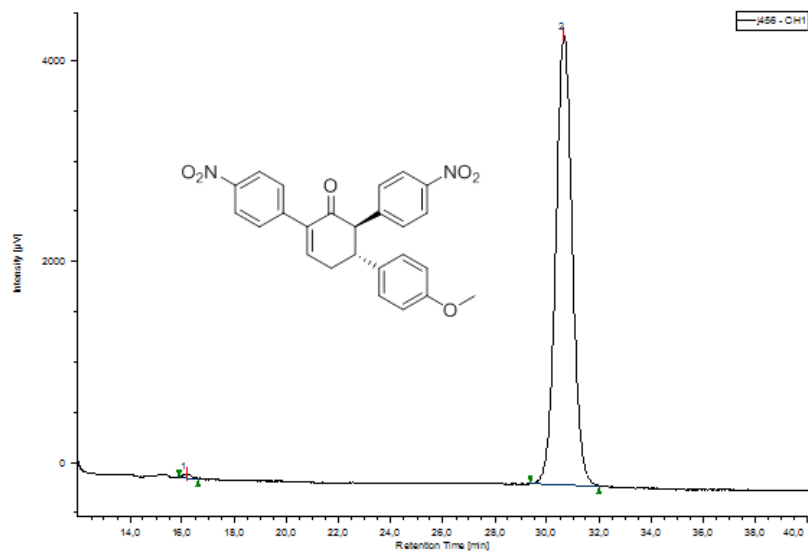

| Peak Name | tR     | Area   | Height | Area%  | Height% | NTP   | Resolution | Symmetry Factor |
|-----------|--------|--------|--------|--------|---------|-------|------------|-----------------|
| 1         | 16,158 | 801    | 39     | 0,406  | 0,854   | 12092 | 16,769     | 1,250           |
| 2         | 30,617 | 196523 | 4470   | 99,594 | 99,146  | 11516 | N/A        | 1,052           |
